# Supplementary material for: China’s Trade of Agricultural Products Drives Substantial Greenhouse Gas Emissions
Source: MDPI journal article supplement (doi:10.3390/ijerph192315774), 2022-11-27
Supplement: s1 [file s1]

## **Supplementary materials**

**Table S1. GHG emissions from agricultural activities.**

**Table S2. The classification details and codes of China's agricultural products.**

**Table S3. Embodied GHG emissions in the exports of China's agricultural products during 1995-2015.**

**Table S4. The proportion of embodied GHG emissions in the exports during 1995-2015.**

**Table S5. The embodied GHG emissions in the exports of China's agricultural products to major countries in 2015.**

**Table S6. The embodied GHG emissions in the imports of China's agricultural products during 1995-2015.**

**Table S7. The proportion of embodied GHG emissions in the imports during 1995-2015.**

**Table S8. The embodied GHG emissions in the imports of China's agricultural products from major countries in 2015.**

**Table S9. The variation trend of net import and export volume of China's agricultural products.**

**Table S10. The variation trend of embodied GHG emissions in the net import and export of China's agricultural products.**

**Table S11. The embodied GHG emissions in the net imports of China's**

agricultural products with major countries from 1995 to 2015.

Table S12. The embodied GHG emissions in the net imports of China's agricultural products with major countries in 2015.

Table S13. The export volume of China's agricultural products from 1995 to 2015.

Table S14. The major export trading partners in 2015.

Table S15. The import volume of China's agricultural products from 1995 to 2015.

Table S16. The major import trading partners in 2015.

Table S17. Carbon emission factors (CEFs) of China's trading partners of agricultural products provided by FAO.

**Table S1.** GHG emissions from agricultural activities.

|                                             |                                                                                                                                                                                                                                                                                                                                                                                 |
|---------------------------------------------|---------------------------------------------------------------------------------------------------------------------------------------------------------------------------------------------------------------------------------------------------------------------------------------------------------------------------------------------------------------------------------|
| Production activities of crops              | Rice planting(CH <sub>4</sub> ); Energy using(CH <sub>4</sub> ); Synthetic fertilizers(N <sub>2</sub> O); Fertilizer applied to soil(N <sub>2</sub> O); Dung left in pasture (N <sub>2</sub> O); Crop residues (N <sub>2</sub> O); Organic soil (N <sub>2</sub> O); Burn as residue (N <sub>2</sub> O、 CH <sub>4</sub> ); burning savanna (N <sub>2</sub> O、 CH <sub>4</sub> ). |
| Production activities of livestock products | Intestinal fermentation (CH <sub>4</sub> );<br>Fertilizer management (N <sub>2</sub> O、 CH <sub>4</sub> )                                                                                                                                                                                                                                                                       |

Source: [1]

**Table S2.** The classification details and codes of China's agricultural products.

| Item    | Code     | Name                                                                |
|---------|----------|---------------------------------------------------------------------|
| Beef    | 02012000 | Fresh and cold bone-in beef                                         |
|         | 02013000 | Fresh, cold boneless beef                                           |
|         | 02021000 | Frozen whole head and half head of beef                             |
|         | 02022000 | Frozen bone-in beef                                                 |
|         | 02023000 | Frozen boneless beef                                                |
|         | 02062100 | Frozen beef tongue                                                  |
|         | 02062200 | Frozen beef liver                                                   |
|         | 02062900 | Other frozen beef mince                                             |
|         | 02102000 | Dried, smoked, salted or salted beef                                |
| Pork    | 02031200 | Fresh, cold bone-in pork foreleg, pork hind leg and its meat pieces |
|         | 02031900 | Other fresh and cold pork                                           |
|         | 02032110 | Frozen whole head and half head of suckling pork                    |
|         | 02032190 | Other frozen whole head and half head pork                          |
|         | 02032200 | Frozen bone-in pork foreleg, pork hind leg and its meat pieces      |
|         | 02032900 | Other frozen pork                                                   |
|         | 02064100 | Frozen pork liver                                                   |
|         | 02064900 | Other frozen pork mince                                             |
|         | 02101110 | Dried, smoked, salted or salted bone-in pork shanks                 |
|         | 02101190 | Dried, smoked, salted or salted other bone-in pork pieces           |
|         | 02101200 | Dried, smoked, salted or salted pork belly (pancetta)               |
|         | 02101900 | Other dried, smoked, salted or salted pork                          |
|         |          |                                                                     |
| Mutton  | 02042200 | Fresh and cold bone-in lamb                                         |
|         | 02043000 | Frozen whole head and half head of lamb                             |
|         | 02044100 | Frozen whole head and half head of lamb                             |
|         | 02044200 | Frozen lamb with bones                                              |
|         | 02044300 | Frozen boneless lamb                                                |
|         | 02045000 | Goat meat                                                           |
| Poultry | 02071100 | Whole chicken, fresh or cold                                        |
|         | 02071200 | Whole chicken, frozen                                               |
|         | 02071311 | Bone-in chicken pieces, fresh or cold                               |
|         | 02071329 | Other chicken mince, fresh or cold                                  |
|         | 02071411 | Frozen chicken pieces with bones                                    |
|         | 02071419 | Other frozen chicken pieces                                         |
|         | 02071421 | Frozen chicken wings (excluding wing tips)                          |
|         | 02071422 | Frozen chicken claws                                                |
|         | 02071429 | Other frozen chicken morsels                                        |
|         | 02072500 | Whole turkey, frozen                                                |
|         | 02072700 | Turkey pieces and miscellaneous, frozen                             |
|         | 02074100 | Whole duck, fresh or cold                                           |
|         | 02074200 | Whole frozen duck                                                   |

|      |          |                                                                                                                                        |
|------|----------|----------------------------------------------------------------------------------------------------------------------------------------|
|      | 02074400 | Duck pieces and miscellaneous, fresh or cold                                                                                           |
|      | 02074500 | Frozen whole duck pieces and miscellaneous                                                                                             |
|      | 02075100 | Whole goose, fresh or cold                                                                                                             |
|      | 02075200 | Whole frozen goose                                                                                                                     |
|      | 02075400 | Fresh or cold goose pieces and miscellaneous                                                                                           |
|      | 02075500 | Frozen goose pieces and miscellaneous                                                                                                  |
|      | 02081020 | Frozen rabbit meat, excluding rabbit head                                                                                              |
|      | 02089010 | Fresh, cold, frozen squab meat and edible miscellaneous mince                                                                          |
| Milk | 04011000 | Unconcentrated and not sweetened with sugar or other sweetening substances<br>milk and cream with a fat content of not more than 1%.   |
|      | 04012000 | Milk and cream not concentrated and not sweetened with sugar or other<br>sweetening substances with a fat content of 1% <6%.           |
|      | 04015000 | Milk and cream, not concentrated and not sweetened with sugar or other<br>sweetening substances, with a fat content of more than 10%   |
|      | 04021000 | Powdered, granulated or other solid milk and cream with a fat content $\leq 1.5$                                                       |
|      | 04022100 | Powdered, granulated or other solid milk and cream with more than 1.5% fat, not<br>sweetened with sugar or other sweetening substances |
|      | 04022900 | Powdered, granulated or other solid milk and cream, fat content > 1.5%,<br>sweetened with sugar or other sweetening substances         |
|      | 04029100 | Non-solid milk and cream, sweetened with no sugar or other sweetening<br>substances                                                    |
|      | 04029900 | Non-solid milk and cream, sweetened with sugar or other sweeteners                                                                     |
|      | 04031000 | Yogurt                                                                                                                                 |
|      | 04039000 | Other buttermilk, caked milk and cream, yogurt and other fermented or acidified<br>milk and cream                                      |
|      | 04041000 | Whey and modified whey, whether or not concentrated, sweetened or otherwise                                                            |
|      | 04049000 | Products containing natural dairy products, whether sweetened or unsweetened,<br>not listed                                            |
|      | 04051000 | Butter                                                                                                                                 |
|      | 04052000 | Milk spreads                                                                                                                           |
|      | 04059000 | Other fats and oils derived from milk                                                                                                  |
|      | 04061000 | Fresh cheese, including whey cheese; curds                                                                                             |
|      | 04062000 | All kinds of grated or powdered cheeses                                                                                                |
|      | 04063000 | Processed cheeses (except grated or powdered)                                                                                          |
|      | 04064000 | Blue cheese and other textured cheeses produced by penicillium                                                                         |
|      | 04069000 | Cheeses not listed                                                                                                                     |
| Egg  | 04071100 | Fertilized eggs for hatching                                                                                                           |
|      | 04072100 | Fresh eggs                                                                                                                             |
|      | 04072900 | Other fresh eggs                                                                                                                       |
|      | 04079010 | Salted eggs                                                                                                                            |
|      | 04079020 | Dried eggs                                                                                                                             |
|      | 04079090 | Unlisted pickled or boiled eggs in shell                                                                                               |
|      | 04081100 | Dried egg yolk                                                                                                                         |

|           |          |                                                              |
|-----------|----------|--------------------------------------------------------------|
|           | 04081900 | Other egg yolks                                              |
|           | 04089100 | Dry shelled eggs                                             |
|           | 04089900 | Other shelled eggs                                           |
| Sugar     | 04090000 | Natural honey                                                |
|           | 04100010 | Bird's nest                                                  |
|           | 04100041 | Fresh Royal Jelly                                            |
|           | 04100042 | Fresh Royal Jelly powder                                     |
|           | 04100043 | Bee pollen                                                   |
|           | 04100049 | Other bee products                                           |
| Vegetable | 07011000 | Seed potatoes                                                |
|           | 07019000 | Fresh or frozen potatoes, except for seed                    |
|           | 07020000 | Fresh or frozen tomatoes                                     |
|           | 07031010 | Fresh or frozen onions                                       |
|           | 07031020 | Fresh or frozen green onions                                 |
|           | 07032010 | Fresh or frozen garlic                                       |
|           | 07032020 | Fresh or frozen garlic moss and garlic plants (green garlic) |
|           | 07032090 | Other fresh or frozen garlic                                 |
|           | 07039010 | Fresh or frozen leeks                                        |
|           | 07039020 | Fresh or frozen shallots                                     |
|           | 07039090 | Fresh or frozen other onion vegetables                       |
|           | 07041000 | Fresh or frozen cauliflower and hard-flowered kale           |
|           | 07042000 | Fresh or frozen rosette kale                                 |
|           | 07049010 | Cabbage, fresh or frozen                                     |
|           | 07049020 | Other fresh or frozen broccoli                               |
|           | 07049090 | Fresh or frozen edible mustard vegetables not listed         |
|           | 07051100 | Fresh or chilled bulb lettuce (lettuce with hearts)          |
|           | 07051900 | Other fresh or frozen romaine lettuce                        |
|           | 07052100 | Vetrov chicory, fresh or chilled                             |
|           | 07052900 | Other fresh or frozen chicory                                |
|           | 07070000 | Cucumbers and gherkins, fresh or frozen                      |
|           | 07081000 | Peas, fresh or frozen                                        |
|           | 07082000 | Cowpeas and beans, fresh or frozen                           |
|           | 07089000 | Other fresh or frozen legumes                                |
|           | 07092000 | Fresh or frozen asparagus                                    |
|           | 07093000 | Fresh or frozen eggplant                                     |
|           | 07094000 | Fresh or frozen celery (except tubers)                       |
|           | 07095100 | Mushrooms of the genus Paramecium, fresh or frozen           |
|           | 07095910 | Fresh or frozen matsutake mushrooms                          |
|           | 07095920 | Fresh or frozen shiitake mushrooms                           |
|           | 07095930 | Fresh or frozen enoki mushroom                               |
|           | 07095940 | Fresh or frozen straw mushrooms                              |
|           | 07095950 | Fresh or frozen portobello mushrooms                         |
|           | 07095960 | Fresh or frozen truffle mushrooms                            |

|          |                                                                          |
|----------|--------------------------------------------------------------------------|
| 07095990 | Other fresh or frozen mushrooms                                          |
| 07096000 | Fresh or frozen peppers, including bell peppers                          |
| 07097000 | Fresh or frozen spinach                                                  |
| 07099300 | Fresh or frozen olive oil                                                |
| 07099300 | Fresh or frozen pumpkin, gourds                                          |
| 07099910 | Fresh or frozen bamboo shoots                                            |
| 07099990 | Fresh or frozen vegetables not listed                                    |
| 07101000 | Frozen potatoes                                                          |
| 07102100 | Frozen peas                                                              |
| 07102210 | Frozen red beans                                                         |
| 07102290 | Frozen cowpeas and other vegetable beans                                 |
| 07102900 | Other frozen legume vegetables                                           |
| 07103000 | Frozen spinach                                                           |
| 07104000 | Frozen sweet corn                                                        |
| 07108010 | Frozen matsutake mushroom                                                |
| 07108020 | Frozen garlic & garlic scapes (green garlic)                             |
| 07108030 | Frozen garlic                                                            |
| 07108040 | Frozen porcini mushrooms                                                 |
| 07108090 | Frozen unlisted vegetables                                               |
| 07109000 | Frozen assorted vegetables                                               |
| 07112000 | Temporarily preserved oil olives                                         |
| 07114000 | Temporarily preserved cucumbers and gherkins                             |
| 07115112 | Brined baby white mushrooms                                              |
| 07115119 | Other mushrooms of the genus <i>Paramecium</i> in brine                  |
| 07115190 | Other mushrooms of the genus <i>Paramecium</i> temporarily preserved     |
| 07115911 | Matsutake mushrooms in brine                                             |
| 07115919 | Other mushrooms and truffles in brine                                    |
| 07115990 | Other mushrooms and truffles temporarily preserved                       |
| 07119031 | Bamboo shoots, brine                                                     |
| 07119034 | Garlic in brine                                                          |
| 07119039 | Other vegetables and assorted vegetables in brine                        |
| 07119090 | Vegetables and assorted vegetables not listed for temporary preservation |
| 07122000 | Dried onions                                                             |
| 07123100 | Dried mushrooms of the genus <i>Paramecium</i>                           |
| 07123200 | Dried wood fungus                                                        |
| 07123300 | Dried silver fungus                                                      |
| 07123910 | Dried shiitake mushrooms                                                 |
| 07123920 | Dried enoki mushrooms                                                    |
| 07123930 | Dried straw mushrooms                                                    |
| 07123940 | Dried portobello mushrooms                                               |
| 07123950 | Dried porcini mushrooms                                                  |
| 07123990 | Dried mushrooms and truffles not listed                                  |
| 07129010 | Dried shredded bamboo shoots                                             |

|       |          |                                                                                                                                                        |
|-------|----------|--------------------------------------------------------------------------------------------------------------------------------------------------------|
|       | 07129020 | Dried vetches (dried vetch)                                                                                                                            |
|       | 07129030 | Golden needle (cauliflower)                                                                                                                            |
|       | 07129040 | Dried fiddleheads                                                                                                                                      |
|       | 07129050 | Dried garlic                                                                                                                                           |
|       | 07129060 | Dried bell pepper                                                                                                                                      |
|       | 07129091 | Horseradish                                                                                                                                            |
|       | 07129099 | Not listed dried vegetables and assorted vegetables                                                                                                    |
| Bean  | 07131010 | Seed peas                                                                                                                                              |
|       | 07131090 | Other dry peas                                                                                                                                         |
|       | 07132010 | Chickpeas for seed                                                                                                                                     |
|       | 07132090 | Other dried chickpeas                                                                                                                                  |
|       | 07133190 | Other dried mung beans                                                                                                                                 |
|       | 07133210 | Red beans (adzuki beans) for seed, podless, dried                                                                                                      |
|       | 07133290 | Other red lentils (adzuki beans), off-pod, dry                                                                                                         |
|       | 07133310 | Kidney beans for seed                                                                                                                                  |
|       | 07133390 | Other dried kidney beans                                                                                                                               |
|       | 07133500 | Cowpeas (cowpeas), dried                                                                                                                               |
|       | 07133900 | Dry beans of unlisted cowpea genus and navy bean genus                                                                                                 |
|       | 07134010 | Lentils for seed use                                                                                                                                   |
|       | 07134090 | Other dry lentils                                                                                                                                      |
|       | 07135010 | Broad beans for seed                                                                                                                                   |
|       | 07135090 | Other dried fava beans                                                                                                                                 |
|       | 07136090 | Other dried wood beans (genus Mucuna)                                                                                                                  |
|       | 07139010 | Other dry podded beans for seed                                                                                                                        |
|       | 07139090 | Other dry podded beans, except for seed                                                                                                                |
| Tuber | 07061000 | Fresh or frozen carrots and radishes                                                                                                                   |
|       | 07069000 | Other fresh or frozen edible roots and tubers                                                                                                          |
|       | 07141010 | Fresh sweet potatoes                                                                                                                                   |
|       | 07141020 | Dried cassava                                                                                                                                          |
|       | 07142019 | Other fresh sweet potatoes                                                                                                                             |
|       | 07142020 | Dried sweet potatoes                                                                                                                                   |
|       | 07142030 | Chilled or frozen sweet potatoes                                                                                                                       |
|       | 07143000 | Yam                                                                                                                                                    |
|       | 07144000 | Taro (Taro spp.)                                                                                                                                       |
|       | 07149010 | Water chestnut                                                                                                                                         |
|       | 07149021 | Roots for seed                                                                                                                                         |
|       | 07149029 | Other roots                                                                                                                                            |
|       | 07149090 | Fresh, cold, frozen or dried bamboo taro, orchid tubers, chrysanthemum taro and unlisted roots containing high starch or inulin; West Valley stem pith |
| Fruit | 08011100 | Dried coconut                                                                                                                                          |
|       | 08011200 | Coconut without inner shell removed                                                                                                                    |
|       | 08011990 | Other coconut                                                                                                                                          |
|       | 08012100 | Brazil nuts unshelled                                                                                                                                  |



|          |                                                |
|----------|------------------------------------------------|
| 08012200 | Brazil nuts in shell                           |
| 08013100 | Unshelled cashew nuts                          |
| 08013200 | Cashew nuts in shell                           |
| 08021100 | Unhusked apricots                              |
| 08021200 | Apricot kernels                                |
| 08022100 | Hazelnuts unshelled                            |
| 08022200 | Hazelnut kernels                               |
| 08023100 | Unshelled walnuts                              |
| 08023200 | Walnut kernels                                 |
| 08024110 | Unshelled chestnuts                            |
| 08024190 | Other unshelled chestnuts                      |
| 08024210 | Chestnuts in shell                             |
| 08024290 | Other chestnuts in shell                       |
| 08025100 | Unshelled pistachios (pistachios)              |
| 08025200 | Pistachios in shell (pistachios)               |
| 08026190 | Other unshelled macadamia nuts (macadamia)     |
| 08026200 | Macadamia nuts in shell (macadamia nuts)       |
| 08028000 | Betel nuts                                     |
| 08029020 | White nuts                                     |
| 08029030 | Pine nuts                                      |
| 08029090 | Fresh or dried nuts not listed                 |
| 08031000 | Fresh or dried plantain                        |
| 08039000 | Other fresh or dried bananas, except plantains |
| 08041000 | Fresh or dried dates                           |
| 08042000 | Fresh or dried figs                            |
| 08043000 | Fresh or dried pineapple                       |
| 08044000 | Fresh or dried avocados                        |
| 08045010 | Guava, fresh or dried                          |
| 08045020 | Fresh or dried mangoes                         |
| 08045030 | Fresh or dried mangosteen                      |
| 08051000 | Fresh or dried oranges                         |
| 08052010 | Fresh or dried banana mandarins                |
| 08052020 | Broad-leaved mandarin oranges                  |
| 08052090 | Other fresh or dried citrus and hybrid citrus  |
| 08054000 | Grapefruit, including pomelo                   |
| 08055000 | Lemons and limes                               |
| 08059000 | Citrus fruits not listed                       |
| 08061000 | Fresh grapes                                   |
| 08062000 | Raisins                                        |
| 08071100 | Fresh watermelons                              |
| 08071910 | Fresh cantaloupes                              |
| 08071990 | Other fresh melons                             |
| 08072000 | Fresh papayas                                  |

|       |          |                                                                                                                                                     |
|-------|----------|-----------------------------------------------------------------------------------------------------------------------------------------------------|
|       | 08081000 | Fresh apples                                                                                                                                        |
|       | 08083010 | Fresh duck pears, snow pears                                                                                                                        |
|       | 08083020 | Fresh balsam pears                                                                                                                                  |
|       | 08083090 | Other fresh pears                                                                                                                                   |
|       | 08091000 | Fresh apricots                                                                                                                                      |
|       | 08092900 | Other fresh cherries                                                                                                                                |
|       | 08093000 | Fresh peaches, including nectarines                                                                                                                 |
|       | 08094000 | Fresh plums and plums                                                                                                                               |
|       | 08101000 | Fresh strawberries                                                                                                                                  |
|       | 08102000 | Fresh raspberries, blackberries, mulberries and loganberries                                                                                        |
|       | 08104000 | Fresh cranberries and lingonberries                                                                                                                 |
|       | 08105000 | Fresh kiwifruit                                                                                                                                     |
|       | 08106000 | Fresh durian                                                                                                                                        |
|       | 08107000 | Fresh persimmons                                                                                                                                    |
|       | 08109010 | Fresh lychees                                                                                                                                       |
|       | 08109030 | Fresh longans                                                                                                                                       |
|       | 08109040 | Fresh rambutans                                                                                                                                     |
|       | 08109050 | Fresh lychees                                                                                                                                       |
|       | 08109060 | Fresh poppy peach                                                                                                                                   |
|       | 08109070 | Fresh lotus mist                                                                                                                                    |
|       | 08109080 | Fresh dragon fruit                                                                                                                                  |
|       | 08109090 | Fresh fruit not listed                                                                                                                              |
|       | 08111000 | Frozen strawberries                                                                                                                                 |
|       | 08112000 | Frozen raspberries, blackberries, blackberries, mulberries, loganberries, currants and galangal                                                     |
|       | 08119010 | Frozen chestnuts, unhulled                                                                                                                          |
|       | 08119090 | Other unlisted frozen fruits and nuts                                                                                                               |
|       | 08121000 | Temporarily preserved cherries                                                                                                                      |
|       | 08129000 | Other temporarily preserved fruits and nuts                                                                                                         |
|       | 08131000 | Dried apricots                                                                                                                                      |
|       | 08132000 | Dried plums and prunes                                                                                                                              |
|       | 08133000 | Dried apples                                                                                                                                        |
|       | 08134010 | Dried longan, meat                                                                                                                                  |
|       | 08134020 | Persimmon cakes                                                                                                                                     |
|       | 08134030 | Red dates                                                                                                                                           |
|       | 08134040 | Dried lychees                                                                                                                                       |
|       | 08134090 | Dried fruits not listed                                                                                                                             |
|       | 08135000 | Assorted nuts or dried fruits of this chapter                                                                                                       |
|       | 08140000 | Citrus fruits or melons (including watermelon) rind, fresh, frozen, dried or temporarily preserved with brine, sulfite water or other preservatives |
| Wheat | 10011100 | Durum wheat for seed                                                                                                                                |
|       | 10011900 | Other durum wheat                                                                                                                                   |
|       | 10019100 | Other wheat and mixed wheat for seed                                                                                                                |

|      |          |                                              |
|------|----------|----------------------------------------------|
|      | 10019900 | Other wheat and mixed wheat, except for seed |
|      | 10021000 | Rye for seed                                 |
|      | 10031000 | Barley for seed                              |
|      | 10039000 | Other barley                                 |
|      | 10041000 | Oats for seed                                |
|      | 10049000 | Other oats                                   |
|      | 10086090 | Other rye                                    |
|      | 11010000 | Wheat and mixed wheat fine flour             |
|      | 11031100 | Wheat coarse grain, coarse flour             |
|      | 11031910 | Oats coarse grain, coarse flour              |
|      | 11041200 | Oats, hydraulic or produced                  |
|      | 11041910 | Barley, hydraulic or produced                |
|      | 11042200 | Oats otherwise processed                     |
|      | 11042910 | Barley otherwise processed                   |
|      | 11081100 | Wheat starch                                 |
| Corn | 10051000 | Corn for seed                                |
|      | 10059000 | Maize, except for seed                       |
|      | 11022000 | Corn fine meal                               |
|      | 11031300 | Corn coarse grain, coarse meal               |
|      | 11042300 | Corn otherwise processed                     |
|      | 11081200 | Corn starch                                  |
| Rice | 10061011 | Indica rice for seed                         |
|      | 10061019 | Other seed rice                              |
|      | 10061091 | Indica rice                                  |
|      | 10061099 | Other rice                                   |
|      | 10062010 | Indica brown rice                            |
|      | 10062090 | Other brown rice                             |
|      | 10063010 | Indica fine rice                             |
|      | 10063090 | Other fine rice                              |
|      | 10064010 | Indica rice broken rice                      |
|      | 10064090 | Other broken rice                            |
|      | 10071000 | Edible sorghum for seed                      |
|      | 10079000 | Other edible sorghum                         |
|      | 10081000 | Buckwheat                                    |
|      | 10082900 | Other grains                                 |
|      | 10089010 | Other seed grains                            |
|      | 10089090 | Unlisted grains                              |
|      | 11029011 | Indica rice fine flour                       |
|      | 11029019 | Other rice fine flour                        |
|      | 11029090 | Fine flour of unlisted grains                |
|      | 11031921 | Indica rice coarse grains, coarse flour      |
|      | 11031929 | Other rice coarse grains, coarse flour       |
|      | 11031990 | Other cereals coarse grains, coarse flour    |

|           |          |                                                                                    |
|-----------|----------|------------------------------------------------------------------------------------|
|           | 11032090 | Other cereal grains                                                                |
|           | 11041990 | Other rolled or produced grains                                                    |
|           | 11042990 | Other processed unlisted grains                                                    |
| Oil crops | 12011000 | Soybeans for seed                                                                  |
|           | 12019010 | Yellow soybeans, except for seed                                                   |
|           | 12019020 | Black soybeans, except for seed                                                    |
|           | 12019030 | Green soybeans, except for seed                                                    |
|           | 12019090 | Other soybeans, except for seed                                                    |
|           | 12023000 | Peanuts for seed                                                                   |
|           | 12024100 | Peanuts, other than seed, not shelled                                              |
|           | 12024200 | Peanuts, other shelled, whether broken or unbroken                                 |
|           | 12040000 | Flaxseed, broken or unbroken                                                       |
|           | 12051010 | Low erucic acid rapeseed for seed                                                  |
|           | 12051090 | Other low erucic acid rapeseed                                                     |
|           | 12059010 | Rapeseed, other than seed                                                          |
|           | 12059090 | Canola seeds, not listed                                                           |
|           | 12060010 | Sunflower seeds for seed                                                           |
|           | 12060090 | Other sunflower seeds                                                              |
|           | 12072100 | Cottonseed for seed                                                                |
|           | 12072900 | Other cotton seeds                                                                 |
|           | 12073010 | Castor seed for seed                                                               |
|           | 12073090 | Other castor seeds                                                                 |
|           | 12074010 | Sesame seeds for seeds                                                             |
|           | 12074090 | Other sesame seeds                                                                 |
|           | 12075010 | Mustard seeds for seeds                                                            |
|           | 12075090 | Other mustard seeds                                                                |
|           | 12076010 | Safflower seeds for seeds                                                          |
|           | 12076090 | Other safflower seeds                                                              |
|           | 12077010 | Sweet melon seeds for seeds                                                        |
|           | 12077091 | Black melon seeds                                                                  |
|           | 12077092 | Red melon seeds                                                                    |
|           | 12077099 | Melon seeds not listed, except for seeds                                           |
|           | 12079100 | Poppy seeds                                                                        |
|           | 12079910 | Other seeds with oil seeds and fruits                                              |
|           | 12079999 | Oil-bearing kernels and fruits not listed                                          |
|           | 12081000 | Soybean flour                                                                      |
|           | 12089000 | Other oil-bearing kernels and fruits fine and coarse powder, except mustard powder |

Source: [2].

**Table S3.** Embodied GHG emissions in the exports of China's agricultural products during 1995-2015 (Unit: 10<sup>4</sup> t CO<sub>2</sub>-eq).

| Year | Corn    | Rice   | Wheat  | Sugar | Tubers | Oil crops | Beans | Fruits | Vegetables | Beef  | Pork   | Mutton | Poultry | Milk  | Eggs  |
|------|---------|--------|--------|-------|--------|-----------|-------|--------|------------|-------|--------|--------|---------|-------|-------|
| 1995 | 5.35    | 49.39  | 37.77  | 0.67  | 5.73   | 128.54    | 39.12 | 301.78 | 55.94      | 31.53 | 125.23 | 11.16  | 52.74   | 7.37  | 12.07 |
| 1996 | 10.52   | 63.32  | 96.83  | 0.58  | 5.87   | 119.60    | 24.06 | 318.87 | 59.86      | 20.43 | 113.80 | 2.44   | 59.03   | 7.23  | 17.73 |
| 1997 | 390.69  | 273.81 | 71.04  | 0.35  | 5.61   | 67.17     | 26.50 | 464.67 | 64.23      | 57.75 | 100.99 | 1.22   | 55.73   | 8.53  | 24.58 |
| 1998 | 293.15  | 994.74 | 30.51  | 0.57  | 6.66   | 69.23     | 21.04 | 352.32 | 79.91      | 73.64 | 96.85  | 1.24   | 41.76   | 8.52  | 22.41 |
| 1999 | 84.49   | 622.86 | 11.75  | 0.56  | 7.39   | 101.03    | 32.35 | 332.34 | 94.15      | 24.12 | 73.51  | 1.10   | 53.26   | 11.06 | 21.00 |
| 2000 | 646.94  | 639.24 | 44.43  | 0.71  | 7.67   | 110.60    | 26.13 | 328.29 | 96.58      | 16.10 | 76.46  | 2.45   | 63.16   | 11.82 | 26.75 |
| 2001 | 374.48  | 386.79 | 81.98  | 0.72  | 8.11   | 120.39    | 30.95 | 420.20 | 118.91     | 16.60 | 94.80  | 1.64   | 63.17   | 9.64  | 25.48 |
| 2002 | 753.68  | 403.58 | 83.51  | 0.60  | 12.51  | 125.56    | 36.91 | 508.02 | 154.34     | 13.90 | 111.82 | 4.38   | 58.31   | 11.60 | 31.94 |
| 2003 | 1060.26 | 546.99 | 137.39 | 0.53  | 11.73  | 131.82    | 44.35 | 501.13 | 137.62     | 9.29  | 132.08 | 20.13  | 51.41   | 10.05 | 35.79 |
| 2004 | 202.27  | 227.61 | 76.70  | 0.51  | 13.39  | 121.85    | 38.37 | 590.83 | 144.81     | 15.47 | 168.11 | 51.11  | 25.22   | 12.67 | 33.17 |
| 2005 | 671.89  | 240.82 | 25.35  | 0.57  | 14.58  | 136.56    | 43.99 | 625.65 | 152.48     | 16.97 | 142.51 | 56.49  | 35.02   | 16.42 | 33.16 |
| 2006 | 249.42  | 308.37 | 76.99  | 0.51  | 14.51  | 111.44    | 38.59 | 732.43 | 166.00     | 23.76 | 153.35 | 65.12  | 28.67   | 16.50 | 31.83 |
| 2007 | 405.34  | 358.00 | 178.58 | 0.52  | 14.08  | 134.74    | 37.43 | 810.34 | 191.83     | 50.62 | 93.01  | 36.10  | 29.61   | 44.30 | 29.01 |
| 2008 | 21.65   | 255.14 | 5.94   | 0.76  | 14.73  | 146.62    | 46.72 | 552.35 | 205.78     | 23.66 | 73.59  | 25.50  | 30.57   | 38.20 | 34.96 |
| 2009 | 12.23   | 217.14 | 6.41   | 0.65  | 14.60  | 110.58    | 47.71 | 639.29 | 199.65     | 12.70 | 71.91  | 12.11  | 30.55   | 10.98 | 32.08 |
| 2010 | 11.20   | 151.34 | 7.77   | 0.91  | 16.13  | 71.92     | 46.74 | 664.47 | 198.04     | 25.80 | 81.76  | 19.91  | 35.01   | 6.88  | 35.51 |
| 2011 | 7.68    | 164.38 | 8.19   | 0.88  | 17.91  | 87.49     | 44.05 | 641.81 | 236.51     | 26.60 | 68.98  | 7.90   | 34.72   | 18.04 | 35.28 |
| 2012 | 4.65    | 98.52  | 4.08   | 0.99  | 21.13  | 99.72     | 48.54 | 571.26 | 229.50     | 18.25 | 67.45  | 3.20   | 32.59   | 15.06 | 35.15 |
| 2013 | 3.30    | 135.87 | 2.53   | 1.09  | 19.27  | 73.21     | 38.11 | 595.23 | 232.11     | 12.56 | 72.81  | 0.81   | 33.56   | 7.84  | 32.33 |
| 2014 | 1.43    | 119.66 | 1.34   | 1.07  | 20.18  | 83.64     | 25.74 | 537.89 | 251.09     | 12.40 | 80.05  | 2.28   | 36.50   | 11.16 | 32.23 |
| 2015 | 1.79    | 86.09  | 0.58   | 1.24  | 20.43  | 65.58     | 21.15 | 529.12 | 254.54     | 10.29 | 72.28  | 2.34   | 38.42   | 7.67  | 33.24 |

Source: [2].

**Table S4.** The proportion of embodied GHG emissions in the exports during 1995-2015. .

| Year | Corn  | Rice  | Wheat | Sugar | Oil crops | Beans | Tubers | Fruits | Vegetables | Beef | Pork  | Mutton | Poultry | Milk | Eggs |
|------|-------|-------|-------|-------|-----------|-------|--------|--------|------------|------|-------|--------|---------|------|------|
| 1995 | 0.6%  | 5.7%  | 4.4%  | 0.1%  | 14.9%     | 4.5%  | 0.7%   | 34.9%  | 6.5%       | 3.6% | 14.5% | 1.3%   | 6.1%    | 0.9% | 1.4% |
| 1996 | 1.1%  | 6.9%  | 10.5% | 0.1%  | 13.0%     | 2.6%  | 0.6%   | 34.7%  | 6.5%       | 2.2% | 12.4% | 0.3%   | 6.4%    | 0.8% | 1.9% |
| 1997 | 24.2% | 17.0% | 4.4%  | 0.0%  | 4.2%      | 1.6%  | 0.3%   | 28.8%  | 4.0%       | 3.6% | 6.3%  | 0.1%   | 3.5%    | 0.5% | 1.5% |
| 1998 | 14.0% | 47.5% | 1.5%  | 0.0%  | 3.3%      | 1.0%  | 0.3%   | 16.8%  | 3.8%       | 3.5% | 4.6%  | 0.1%   | 2.0%    | 0.4% | 1.1% |
| 1999 | 5.7%  | 42.3% | 0.8%  | 0.0%  | 6.9%      | 2.2%  | 0.5%   | 22.6%  | 6.4%       | 1.6% | 5.0%  | 0.1%   | 3.6%    | 0.8% | 1.4% |
| 2000 | 30.8% | 30.5% | 2.1%  | 0.0%  | 5.3%      | 1.2%  | 0.4%   | 15.7%  | 4.6%       | 0.8% | 3.6%  | 0.1%   | 3.0%    | 0.6% | 1.3% |
| 2001 | 21.4% | 22.1% | 4.7%  | 0.0%  | 6.9%      | 1.8%  | 0.5%   | 24.0%  | 6.8%       | 0.9% | 5.4%  | 0.1%   | 3.6%    | 0.5% | 1.5% |
| 2002 | 32.6% | 17.5% | 3.6%  | 0.0%  | 5.4%      | 1.6%  | 0.5%   | 22.0%  | 6.7%       | 0.6% | 4.8%  | 0.2%   | 2.5%    | 0.5% | 1.4% |
| 2003 | 37.5% | 19.3% | 4.9%  | 0.0%  | 4.7%      | 1.6%  | 0.4%   | 17.7%  | 4.9%       | 0.3% | 4.7%  | 0.7%   | 1.8%    | 0.4% | 1.3% |
| 2004 | 11.7% | 13.2% | 4.5%  | 0.0%  | 7.1%      | 2.2%  | 0.8%   | 34.3%  | 8.4%       | 0.9% | 9.8%  | 3.0%   | 1.5%    | 0.7% | 1.9% |
| 2005 | 30.4% | 10.9% | 1.1%  | 0.0%  | 6.2%      | 2.0%  | 0.7%   | 28.3%  | 6.9%       | 0.8% | 6.4%  | 2.6%   | 1.6%    | 0.7% | 1.5% |
| 2006 | 12.4% | 15.3% | 3.8%  | 0.0%  | 5.5%      | 1.9%  | 0.7%   | 36.3%  | 8.2%       | 1.2% | 7.6%  | 3.2%   | 1.4%    | 0.8% | 1.6% |
| 2007 | 16.8% | 14.8% | 7.4%  | 0.0%  | 5.6%      | 1.6%  | 0.6%   | 33.6%  | 7.9%       | 2.1% | 3.9%  | 1.5%   | 1.2%    | 1.8% | 1.2% |
| 2008 | 1.5%  | 17.3% | 0.4%  | 0.1%  | 9.9%      | 3.2%  | 1.0%   | 37.4%  | 13.9%      | 1.6% | 5.0%  | 1.7%   | 2.1%    | 2.6% | 2.4% |
| 2009 | 0.9%  | 15.3% | 0.5%  | 0.0%  | 7.8%      | 3.4%  | 1.0%   | 45.1%  | 14.1%      | 0.9% | 5.1%  | 0.9%   | 2.2%    | 0.8% | 2.3% |
| 2010 | 0.8%  | 11.0% | 0.6%  | 0.1%  | 5.2%      | 3.4%  | 1.2%   | 48.4%  | 14.4%      | 1.9% | 6.0%  | 1.4%   | 2.5%    | 0.5% | 2.6% |
| 2011 | 0.5%  | 11.7% | 0.6%  | 0.1%  | 6.2%      | 3.1%  | 1.3%   | 45.8%  | 16.9%      | 1.9% | 4.9%  | 0.6%   | 2.5%    | 1.3% | 2.5% |
| 2012 | 0.4%  | 7.9%  | 0.3%  | 0.1%  | 8.0%      | 3.9%  | 1.7%   | 45.7%  | 18.4%      | 1.5% | 5.4%  | 0.3%   | 2.6%    | 1.2% | 2.8% |
| 2013 | 0.3%  | 10.8% | 0.2%  | 0.1%  | 5.8%      | 3.0%  | 1.5%   | 47.2%  | 18.4%      | 1.0% | 5.8%  | 0.1%   | 2.7%    | 0.6% | 2.6% |
| 2014 | 0.1%  | 9.8%  | 0.1%  | 0.1%  | 6.9%      | 2.1%  | 1.7%   | 44.2%  | 20.6%      | 1.0% | 6.6%  | 0.2%   | 3.0%    | 0.9% | 2.6% |
| 2015 | 0.2%  | 7.5%  | 0.1%  | 0.1%  | 5.7%      | 1.8%  | 1.8%   | 46.2%  | 22.2%      | 0.9% | 6.3%  | 0.2%   | 3.4%    | 0.7% | 2.9% |

Source: [2].

**Table S5.** The embodied GHG emissions in the exports of China's agricultural products to major countries in 2015 (Unit: 10<sup>4</sup> t CO<sub>2</sub>-eq).

| Country (region) | Export | Proportion |
|------------------|--------|------------|
| Mongolia         | 281.26 | 24.57%     |
| Hong Kong        | 175.68 | 15.35%     |
| Singapore        | 151.86 | 13.27%     |
| South Korea      | 104.09 | 9.09%      |
| Japan            | 74.04  | 6.47%      |
| Vietnam          | 36.46  | 3.19%      |
| Netherlands      | 30.51  | 2.66%      |
| Germany          | 29.65  | 2.59%      |
| Thailand         | 27.61  | 2.41%      |
| Russian          | 23.25  | 2.03%      |
| Others           | 210.34 | 18.37%     |

Source: [2].

**Table S6.** The embodied GHG emissions in the imports of China's agricultural products during 1995-2015 (Unit: 10<sup>4</sup> t CO<sub>2</sub>-eq).

| Year | Corn  | Rice    | Wheat  | Sugar | Tubers | Oil crops | Beans | Fruits | Vegetables | Beef   | Pork   | Mutton | Poultry | Milk   | Eggs |
|------|-------|---------|--------|-------|--------|-----------|-------|--------|------------|--------|--------|--------|---------|--------|------|
| 1995 | 59.19 | 383.24  | 502.20 | 0.00  | 3.87   | 15.81     | 0.15  | 10.98  | 0.19       | 10.41  | 10.35  | 4.56   | 40.80   | 12.52  | 0.22 |
| 1996 | 5.64  | 189.76  | 556.91 | 0.00  | 0.80   | 47.50     | 4.25  | 17.97  | 0.41       | 11.76  | 2.43   | 9.11   | 48.13   | 14.58  | 0.41 |
| 1997 | 0.14  | 62.72   | 238.14 | 0.00  | 2.28   | 128.84    | 2.09  | 24.25  | 0.53       | 9.70   | 4.61   | 11.28  | 30.94   | 18.67  | 0.87 |
| 1998 | 5.85  | 68.24   | 190.35 | 0.00  | 2.28   | 183.98    | 1.71  | 23.21  | 0.83       | 18.04  | 18.08  | 25.54  | 27.71   | 21.84  | 0.26 |
| 1999 | 1.34  | 48.86   | 214.11 | 0.00  | 3.05   | 302.62    | 2.06  | 44.19  | 1.76       | 29.10  | 88.34  | 29.01  | 116.55  | 25.28  | 0.13 |
| 2000 | 0.55  | 24.88   | 289.67 | 0.04  | 25.69  | 1340.48   | 10.58 | 98.40  | 4.84       | 53.44  | 154.30 | 48.90  | 129.10  | 21.88  | 0.03 |
| 2001 | 1.22  | 77.19   | 205.55 | 0.00  | 12.99  | 713.20    | 2.51  | 99.48  | 3.02       | 41.61  | 139.97 | 68.95  | 107.80  | 28.31  | 0.09 |
| 2002 | 0.33  | 62.58   | 203.76 | 0.00  | 11.91  | 566.71    | 2.09  | 122.02 | 2.00       | 52.89  | 160.02 | 94.07  | 86.98   | 39.20  | 0.09 |
| 2003 | 0.08  | 68.28   | 90.41  | 0.00  | 17.09  | 986.64    | 1.28  | 92.96  | 1.87       | 74.77  | 224.15 | 93.02  | 97.12   | 47.38  | 0.06 |
| 2004 | 0.14  | 197.69  | 537.78 | 0.00  | 23.51  | 957.10    | 1.79  | 154.66 | 2.04       | 100.96 | 209.38 | 88.49  | 23.10   | 52.67  | 0.00 |
| 2005 | 0.48  | 134.19  | 349.03 | 0.00  | 22.60  | 1291.66   | 3.98  | 68.75  | 2.98       | 31.92  | 137.87 | 109.72 | 51.43   | 47.99  | 0.01 |
| 2006 | 1.05  | 189.22  | 241.71 | 0.00  | 34.05  | 1447.67   | 5.44  | 180.20 | 7.87       | 12.47  | 137.41 | 96.89  | 81.40   | 53.21  | 0.09 |
| 2007 | 0.63  | 126.22  | 71.05  | 0.00  | 33.46  | 1535.27   | 4.73  | 105.49 | 0.58       | 21.58  | 296.03 | 122.97 | 108.23  | 45.46  | 0.02 |
| 2008 | 0.68  | 88.54   | 96.21  | 0.01  | 14.77  | 1850.48   | 4.89  | 91.64  | 0.58       | 16.39  | 605.17 | 145.88 | 111.84  | 50.89  | 0.22 |
| 2009 | 3.39  | 143.32  | 23.61  | 0.01  | 153.93 | 1443.01   | 5.85  | 106.65 | 0.65       | 47.82  | 355.14 | 177.62 | 106.24  | 91.49  | 0.06 |
| 2010 | 17.99 | 111.23  | 278.15 | 0.01  | 39.22  | 2760.83   | 9.03  | 117.77 | 1.67       | 88.75  | 612.60 | 153.46 | 61.15   | 118.07 | 0.16 |
| 2011 | 19.58 | 131.62  | 248.61 | 0.01  | 36.58  | 2685.52   | 11.11 | 158.32 | 1.25       | 84.88  | 943.81 | 217.22 | 49.12   | 142.40 | 0.08 |
| 2012 | 57.50 | 462.10  | 554.22 | 0.01  | 51.73  | 3066.12   | 10.32 | 174.30 | 2.41       | 159.62 | 888.76 | 348.76 | 65.82   | 182.60 | 0.00 |
| 2013 | 36.41 | 629.86  | 467.85 | 0.01  | 50.49  | 3384.75   | 15.04 | 156.00 | 2.10       | 489.72 | 856.81 | 675.55 | 78.95   | 251.82 | 0.03 |
| 2014 | 29.88 | 1605.84 | 678.00 | 0.02  | 57.94  | 3781.09   | 12.06 | 175.11 | 1.88       | 572.88 | 850.05 | 742.06 | 60.34   | 285.61 | 0.00 |
| 2015 | 45.53 | 2681.67 | 827.65 | 0.02  | 63.51  | 4327.18   | 13.76 | 266.25 | 2.40       | 738.26 | 924.88 | 591.14 | 46.86   | 243.78 | 0.00 |

Source: [2].



**Table S7.** The proportion of embodied GHG emissions in the imports during 1995-2015.

| Year | Corn | Rice  | Wheat | Sugar | Oil crops | Beans | Tubers | Fruits | Vegetables | Beef | Pork  | Mutton | Poultry | Milk | Eggs |
|------|------|-------|-------|-------|-----------|-------|--------|--------|------------|------|-------|--------|---------|------|------|
| 1995 | 5.6% | 36.3% | 47.6% | 0.0%  | 1.5%      | 0.0%  | 0.4%   | 1.0%   | 0.0%       | 1.0% | 1.0%  | 0.4%   | 3.9%    | 1.2% | 0.0% |
| 1996 | 0.6% | 20.9% | 61.2% | 0.0%  | 5.2%      | 0.5%  | 0.1%   | 2.0%   | 0.0%       | 1.3% | 0.3%  | 1.0%   | 5.3%    | 1.6% | 0.0% |
| 1997 | 0.0% | 11.7% | 44.5% | 0.0%  | 24.1%     | 0.4%  | 0.4%   | 4.5%   | 0.1%       | 1.8% | 0.9%  | 2.1%   | 5.8%    | 3.5% | 0.2% |
| 1998 | 1.0% | 11.6% | 32.4% | 0.0%  | 31.3%     | 0.3%  | 0.4%   | 3.9%   | 0.1%       | 3.1% | 3.1%  | 4.3%   | 4.7%    | 3.7% | 0.0% |
| 1999 | 0.1% | 5.4%  | 23.6% | 0.0%  | 33.4%     | 0.2%  | 0.3%   | 4.9%   | 0.2%       | 3.2% | 9.7%  | 3.2%   | 12.9%   | 2.8% | 0.0% |
| 2000 | 0.0% | 1.1%  | 13.2% | 0.0%  | 60.9%     | 0.5%  | 1.2%   | 4.5%   | 0.2%       | 2.4% | 7.0%  | 2.2%   | 5.9%    | 1.0% | 0.0% |
| 2001 | 0.1% | 5.1%  | 13.7% | 0.0%  | 47.5%     | 0.2%  | 0.9%   | 6.6%   | 0.2%       | 2.8% | 9.3%  | 4.6%   | 7.2%    | 1.9% | 0.0% |
| 2002 | 0.0% | 4.5%  | 14.5% | 0.0%  | 40.3%     | 0.1%  | 0.8%   | 8.7%   | 0.1%       | 3.8% | 11.4% | 6.7%   | 6.2%    | 2.8% | 0.0% |
| 2003 | 0.0% | 3.8%  | 5.0%  | 0.0%  | 55.0%     | 0.1%  | 1.0%   | 5.2%   | 0.1%       | 4.2% | 12.5% | 5.2%   | 5.4%    | 2.6% | 0.0% |
| 2004 | 0.0% | 8.4%  | 22.9% | 0.0%  | 40.7%     | 0.1%  | 1.0%   | 6.6%   | 0.1%       | 4.3% | 8.9%  | 3.8%   | 1.0%    | 2.2% | 0.0% |
| 2005 | 0.0% | 6.0%  | 15.5% | 0.0%  | 57.3%     | 0.2%  | 1.0%   | 3.1%   | 0.1%       | 1.4% | 6.1%  | 4.9%   | 2.3%    | 2.1% | 0.0% |
| 2006 | 0.0% | 7.6%  | 9.7%  | 0.0%  | 58.2%     | 0.2%  | 1.4%   | 7.2%   | 0.3%       | 0.5% | 5.5%  | 3.9%   | 3.3%    | 2.1% | 0.0% |
| 2007 | 0.0% | 5.1%  | 2.9%  | 0.0%  | 62.1%     | 0.2%  | 1.4%   | 4.3%   | 0.0%       | 0.9% | 12.0% | 5.0%   | 4.4%    | 1.8% | 0.0% |
| 2008 | 0.0% | 2.9%  | 3.1%  | 0.0%  | 60.1%     | 0.2%  | 0.5%   | 3.0%   | 0.0%       | 0.5% | 19.7% | 4.7%   | 3.6%    | 1.7% | 0.0% |
| 2009 | 0.1% | 5.4%  | 0.9%  | 0.0%  | 54.3%     | 0.2%  | 5.8%   | 4.0%   | 0.0%       | 1.8% | 13.4% | 6.7%   | 4.0%    | 3.4% | 0.0% |
| 2010 | 0.4% | 2.5%  | 6.4%  | 0.0%  | 63.2%     | 0.2%  | 0.9%   | 2.7%   | 0.0%       | 2.0% | 14.0% | 3.5%   | 1.4%    | 2.7% | 0.0% |
| 2011 | 0.4% | 2.8%  | 5.3%  | 0.0%  | 56.8%     | 0.2%  | 0.8%   | 3.3%   | 0.0%       | 1.8% | 20.0% | 4.6%   | 1.0%    | 3.0% | 0.0% |
| 2012 | 1.0% | 7.7%  | 9.2%  | 0.0%  | 50.9%     | 0.2%  | 0.9%   | 2.9%   | 0.0%       | 2.6% | 14.8% | 5.8%   | 1.1%    | 3.0% | 0.0% |
| 2013 | 0.5% | 8.9%  | 6.6%  | 0.0%  | 47.7%     | 0.2%  | 0.7%   | 2.2%   | 0.0%       | 6.9% | 12.1% | 9.5%   | 1.1%    | 3.5% | 0.0% |
| 2014 | 0.3% | 18.1% | 7.7%  | 0.0%  | 42.7%     | 0.1%  | 0.7%   | 2.0%   | 0.0%       | 6.5% | 9.6%  | 8.4%   | 0.7%    | 3.2% | 0.0% |
| 2015 | 0.4% | 24.9% | 7.7%  | 0.0%  | 40.2%     | 0.1%  | 0.6%   | 2.5%   | 0.0%       | 6.9% | 8.6%  | 5.5%   | 0.4%    | 2.3% | 0.0% |

Source: [2].

**Table S8.** The embodied GHG emissions in the imports of China's agricultural products from major countries in 2015 (Unit: 10<sup>4</sup> t CO<sub>2</sub>-eq).

| Country (region) | Import  | Proportion |
|------------------|---------|------------|
| U.S.             | 3117.61 | 28.94%     |
| Brazil           | 2111.45 | 19.60%     |
| Australia        | 1413.09 | 13.12%     |
| New Zealand      | 727.02  | 6.75%      |
| Argentina        | 567.51  | 5.27%      |
| Uruguay          | 516.59  | 4.79%      |
| Vietnam          | 351.00  | 3.26%      |
| Thailand         | 324.17  | 3.01%      |
| Canada           | 311.14  | 2.89%      |
| Germany          | 205.10  | 1.90%      |
| Others           | 1128.21 | 10.47%     |

Source: [2].

**Table S9.** The variation trend of net import and export volume of China's agricultural products (Unit: 10<sup>4</sup> t).

| Year | Export   | Import   | Net      | Total    |
|------|----------|----------|----------|----------|
| 1995 | -553.77  | 2190.51  | 1636.74  | 2744.28  |
| 1996 | -558.78  | 1331.47  | 772.70   | 1890.25  |
| 1997 | -1253.29 | 870.44   | -382.85  | 2123.74  |
| 1998 | -1321.90 | 1007.15  | -314.75  | 2329.04  |
| 1999 | -1256.25 | 1265.31  | 9.07     | 2521.56  |
| 2000 | -1922.48 | 1931.71  | 9.23     | 3854.19  |
| 2001 | -1496.75 | 2343.97  | 847.21   | 3840.72  |
| 2002 | -2216.07 | 1888.72  | -327.35  | 4104.79  |
| 2003 | -3053.58 | 2800.70  | -252.88  | 5854.27  |
| 2004 | -1352.59 | 3616.72  | 2264.13  | 4969.32  |
| 2005 | -1992.87 | 3912.89  | 1920.02  | 5905.75  |
| 2006 | -1598.60 | 4076.26  | 2477.66  | 5674.86  |
| 2007 | -2096.41 | 4150.07  | 2053.66  | 6246.48  |
| 2008 | -1360.28 | 4686.19  | 3325.90  | 6046.47  |
| 2009 | -1319.57 | 6043.16  | 4723.59  | 7362.72  |
| 2010 | -1275.45 | 7422.07  | 6146.62  | 8697.51  |
| 2011 | -1350.13 | 7205.73  | 5855.60  | 8555.86  |
| 2012 | -1303.91 | 9074.94  | 7771.03  | 10378.85 |
| 2013 | -1305.93 | 9827.65  | 8521.73  | 11133.58 |
| 2014 | -1262.74 | 11480.72 | 10217.98 | 12743.46 |
| 2015 | -1262.74 | 13943.71 | 12680.98 | 15206.45 |

Source: [2].

**Table S10.** The variation trend of embodied GHG emissions in the net import and export of China's agricultural products (Unit:  $10^4$  t CO<sub>2</sub>-eq).

| Year | Export   | Import   | Net      | Total    |
|------|----------|----------|----------|----------|
| 1995 | -864.39  | 1054.49  | 190.11   | 1918.88  |
| 1996 | -920.16  | 909.68   | -10.48   | 1829.84  |
| 1997 | -1612.87 | 535.05   | -1077.82 | 2147.93  |
| 1998 | -2092.53 | 587.91   | -1504.62 | 2680.45  |
| 1999 | -1470.98 | 906.40   | -564.58  | 2377.38  |
| 2000 | -2097.33 | 2202.79  | 105.46   | 4300.12  |
| 2001 | -1753.86 | 1501.89  | -251.97  | 3255.75  |
| 2002 | -2310.65 | 1404.66  | -906.00  | 3715.31  |
| 2003 | -2830.56 | 1795.12  | -1035.44 | 4625.68  |
| 2004 | -1722.08 | 2349.33  | 627.25   | 4071.41  |
| 2005 | -2212.45 | 2252.61  | 40.16    | 4465.06  |
| 2006 | -2017.49 | 2488.68  | 471.18   | 4506.17  |
| 2007 | -2413.51 | 2471.72  | 58.21    | 4885.23  |
| 2008 | -1476.18 | 3078.20  | 1602.03  | 4554.38  |
| 2009 | -1418.59 | 2658.80  | 1240.20  | 4077.39  |
| 2010 | -1373.38 | 4370.08  | 2996.70  | 5743.46  |
| 2011 | -1400.42 | 4730.10  | 3329.68  | 6130.52  |
| 2012 | -1250.08 | 6024.27  | 4774.19  | 7274.34  |
| 2013 | -1260.63 | 7095.39  | 5834.76  | 8356.02  |
| 2014 | -1216.67 | 8852.77  | 7636.10  | 10069.44 |
| 2015 | -1144.76 | 10772.88 | 9628.13  | 11917.64 |

Source: [2].

**Table S11.** The embodied GHG emissions in the net imports of China's agricultural products with major countries from 1995 to 2015 (Unit: 10<sup>4</sup> t CO<sub>2</sub>-eq).

| Country<br>(region) | Corn     | Rice    | Wheat   | Sugar | Oil crops | Beans  | Tubers | Fruits   | Vegetables | Beef    | Pork     | Mutton  | Poultry | Milk    | Eggs    |
|---------------------|----------|---------|---------|-------|-----------|--------|--------|----------|------------|---------|----------|---------|---------|---------|---------|
| South Korea         | -3772.35 | -783.09 | -445.18 | -0.01 | -848.98   | -77.72 | 81.20  | -39.08   | -205.39    | -0.75   | -4.76    | 0.03    | -8.44   | 1.23    | -1.50   |
| Mongolia            | 0.00     | -0.49   | -420.15 | -0.03 | 169.85    | -0.03  | -8.91  | -4184.87 | -335.11    | 6.88    | -7.73    | 0.22    | -0.65   | -6.69   | -0.04   |
| Singapore           | 0.01     | -0.01   | 0.07    | -0.09 | -40.38    | 0.00   | -47.21 | -3346.13 | -530.26    | 0.00    | -66.67   | 0.00    | -6.69   | 0.01    | -7.16   |
| Japan               | -621.45  | -811.10 | -0.60   | -9.11 | -621.69   | -95.13 | -68.00 | -140.62  | -476.50    | -1.42   | -0.30    | -0.49   | -183.60 | -0.18   | -112.18 |
| Hong Kong           | 0.01     | -3.13   | 0.04    | -0.04 | 0.02      | 0.01   | -31.25 | -403.24  | -446.60    | -124.30 | -1493.76 | 0.00    | -436.04 | -111.70 | -324.41 |
| New Zealand         | -3.21    | -0.01   | 9.85    | 0.00  | -21.57    | 1.73   | -0.25  | 460.23   | -2.67      | 572.99  | 0.07     | 2229.02 | 0.51    | 913.25  | -0.35   |
| Argentina           | 6.36     | 15.59   | 27.49   | 0.00  | 5273.57   | -0.19  | 0.00   | 0.99     | -0.76      | 105.99  | 0.04     | 0.00    | 62.34   | 16.42   | 0.00    |
| Australia           | -1.15    | 399.08  | 4805.43 | -0.22 | 418.95    | 4.42   | -0.04  | 3.48     | -11.06     | 1045.10 | 4.00     | 1230.24 | 5.74    | 106.28  | -5.23   |
| Brazil              | 0.27     | -1.66   | 0.00    | 0.00  | 11724.70  | -28.20 | 0.00   | -0.43    | -33.45     | 110.20  | 3.24     | 0.00    | 259.38  | 0.24    | 0.00    |
| U.S.                | 203.83   | 2684.35 | 705.77  | -0.81 | 10597.32  | 0.13   | -1.06  | 47.44    | -49.97     | 139.12  | 2638.83  | 0.22    | 968.59  | 262.55  | -67.31  |

Source: [2].

**Table S12.** The embodied GHG emissions in the net imports of China's agricultural products with major countries in 2015 (Unit: 10<sup>2</sup> t CO<sub>2</sub>-eq).

| Country<br>(region) | Corn   | Rice      | Wheat    | Sugar  | Oil crops | Beans   | Tubers  | Fruits    | Vegetables | Beef         | Pork     | Mutton   | Poultry  | Milk     | Eggs     |
|---------------------|--------|-----------|----------|--------|-----------|---------|---------|-----------|------------|--------------|----------|----------|----------|----------|----------|
| South Korea         | 0.26   | -4784.49  | 18.87    | 0.00   | -2642.50  | -222.39 | -473.50 | -133.13   | -2061.39   | 0.00         | 0.00     | 0.00     | 0.00     | 45.46    | -8.74    |
| Mongolia            | 0.00   | 0.00      | 89.58    | 0.00   | 7232.90   | -0.86   | -59.21  | -21056.74 | -3034.34   | 0.00         | -90.73   | -0.19    | -20.67   | -13.43   | -0.43    |
| Singapore           | 0.00   | 0.00      | 0.00     | 0.00   | -123.97   | 0.00    | -348.51 | -10762.62 | -3847.08   | 0.00         | -65.39   | 0.00     | 0.00     | 0.00     | -38.68   |
| Japan               | 0.22   | -2415.18  | 4.48     | -26.12 | -884.57   | -325.51 | -321.15 | -417.62   | -2438.30   | 0.00         | 0.00     | 0.00     | -0.79    | 0.01     | -544.93  |
| Hong Kong           | 0.00   | 0.00      | 0.00     | 0.00   | 0.00      | 0.00    | -203.94 | -2344.36  | -3371.17   | -367.14      | -6598.64 | 0.00     | -2333.56 | -419.86  | -1929.64 |
| New Zealand         | -4.13  | 0.00      | -1.90    | 0.00   | -65.58    | 9.57    | -1.60   | 6590.56   | -106.02    | 15202.4<br>1 | 0.00     | 38570.77 | 0.00     | 11828.21 | -3.78    |
| Argentina           | 0.02   | 1560.64   | 161.73   | -0.02  | 48227.76  | -0.72   | 0.00    | 1.15      | -2.42      | 6228.25      | 0.00     | 0.00     | 300.26   | 270.56   | 0.00     |
| Australia           | -5.68  | 30864.43  | 62327.19 | -3.05  | 3586.31   | 48.20   | -0.24   | 335.19    | -56.84     | 22610.3<br>3 | 0.00     | 19940.92 | 0.00     | 1435.72  | -48.41   |
| Brazil              | -0.11  | -12.60    | 0.00     | 0.04   | 200383.46 | -51.58  | 0.00    | -7.38     | -230.47    | 7275.93      | 96.18    | 0.00     | 3388.29  | 0.00     | 0.00     |
| U.S.                | 509.87 | 167572.00 | 2342.02  | -0.12  | 119268.34 | 84.93   | -6.20   | 316.19    | -258.59    | 0.16         | 17632.31 | 0.00     | 508.45   | 3087.15  | -290.03  |

Source: [2].

**Table S13.** The export volume of China's agricultural products from 1995 to 2015 (Unit: 10<sup>4</sup> t).

| Year | Corn    | Rice   | Wheat  | Sugar | Tuber | Oil crops | Bean   | Fruits | Vegetables | Beef | Pork  | Mutton | Poultry | Milk  | Egg   |
|------|---------|--------|--------|-------|-------|-----------|--------|--------|------------|------|-------|--------|---------|-------|-------|
| 1995 | 13.82   | 26.23  | 23.31  | 8.72  | 18.32 | 96.82     | 104.12 | 52.15  | 117.47     | 5.07 | 41.77 | 0.83   | 38.90   | 3.05  | 3.19  |
| 1996 | 25.29   | 39.83  | 57.25  | 8.36  | 15.79 | 73.58     | 54.71  | 59.46  | 131.87     | 3.56 | 37.91 | 0.24   | 43.31   | 3.14  | 4.48  |
| 1997 | 664.80  | 117.03 | 46.88  | 4.86  | 12.67 | 44.95     | 59.36  | 76.63  | 133.73     | 5.01 | 34.03 | 0.17   | 42.88   | 3.90  | 6.40  |
| 1998 | 469.77  | 387.08 | 28.73  | 7.92  | 18.99 | 47.35     | 47.25  | 71.99  | 159.13     | 6.36 | 33.03 | 0.32   | 34.30   | 3.75  | 5.95  |
| 1999 | 434.12  | 283.92 | 17.45  | 8.65  | 20.46 | 71.27     | 81.08  | 80.55  | 177.57     | 3.60 | 25.66 | 0.38   | 42.76   | 4.04  | 4.73  |
| 2000 | 1054.23 | 307.92 | 19.41  | 10.37 | 22.62 | 80.40     | 57.20  | 88.61  | 190.09     | 3.38 | 26.34 | 0.46   | 49.94   | 4.80  | 6.73  |
| 2001 | 606.20  | 199.32 | 71.93  | 10.74 | 24.69 | 93.93     | 71.89  | 89.20  | 237.17     | 3.64 | 30.59 | 0.32   | 46.80   | 4.27  | 6.07  |
| 2002 | 1177.11 | 210.98 | 98.54  | 7.72  | 34.95 | 101.86    | 86.04  | 123.33 | 281.87     | 2.73 | 35.62 | 0.52   | 41.06   | 5.10  | 8.66  |
| 2003 | 1650.96 | 295.33 | 253.33 | 8.50  | 42.32 | 103.54    | 104.11 | 162.93 | 338.51     | 2.23 | 40.83 | 1.27   | 35.04   | 4.89  | 9.79  |
| 2004 | 242.91  | 119.47 | 114.48 | 8.22  | 52.24 | 93.12     | 79.54  | 191.91 | 364.21     | 3.10 | 49.75 | 2.88   | 15.68   | 6.01  | 9.08  |
| 2005 | 878.14  | 80.70  | 62.31  | 8.95  | 63.56 | 110.56    | 86.79  | 219.48 | 395.31     | 3.31 | 43.35 | 3.23   | 21.53   | 6.98  | 8.66  |
| 2006 | 328.44  | 136.34 | 153.15 | 8.27  | 68.16 | 93.61     | 80.14  | 215.30 | 429.68     | 2.78 | 44.80 | 3.60   | 18.34   | 7.49  | 8.50  |
| 2007 | 526.31  | 169.22 | 321.96 | 6.63  | 63.88 | 100.50    | 85.95  | 262.42 | 482.05     | 4.16 | 30.04 | 2.26   | 19.20   | 13.46 | 8.37  |
| 2008 | 71.86   | 117.41 | 34.68  | 8.69  | 62.35 | 95.35     | 103.12 | 306.49 | 488.21     | 3.18 | 25.23 | 1.51   | 19.87   | 12.06 | 10.28 |
| 2009 | 41.94   | 92.76  | 27.29  | 7.36  | 63.25 | 81.60     | 109.56 | 349.65 | 485.66     | 1.39 | 24.99 | 1.02   | 19.94   | 3.68  | 9.48  |
| 2010 | 49.39   | 74.23  | 30.35  | 10.37 | 69.37 | 60.12     | 100.00 | 322.28 | 489.10     | 4.02 | 27.95 | 1.41   | 22.98   | 3.38  | 10.51 |
| 2011 | 36.23   | 74.17  | 34.69  | 10.28 | 71.99 | 64.44     | 99.19  | 312.26 | 577.91     | 4.03 | 23.77 | 0.86   | 23.08   | 6.79  | 10.44 |
| 2012 | 36.29   | 46.80  | 29.59  | 11.29 | 81.72 | 77.51     | 98.44  | 328.23 | 530.70     | 2.89 | 23.51 | 0.54   | 21.66   | 4.49  | 10.25 |
| 2013 | 17.46   | 60.78  | 28.59  | 12.77 | 80.52 | 65.65     | 84.18  | 318.76 | 574.25     | 1.83 | 25.45 | 0.35   | 22.41   | 3.61  | 9.33  |
| 2014 | 7.65    | 55.80  | 19.64  | 13.29 | 81.97 | 65.11     | 54.67  | 289.05 | 607.85     | 1.90 | 27.41 | 0.46   | 24.50   | 3.99  | 9.46  |
| 2015 | 8.49    | 39.78  | 12.57  | 14.87 | 86.74 | 63.33     | 49.93  | 304.29 | 616.30     | 1.69 | 25.17 | 0.39   | 26.08   | 3.33  | 9.76  |

Source: [2].



**Table S14.** The major export trading partners in 2015 (Unit: 10<sup>4</sup> t).

| Country (region) | Export volume | Proportion |
|------------------|---------------|------------|
| Hong Kong        | 167.05        | 13.23%     |
| Vietnam          | 128.21        | 10.15%     |
| Japan            | 118.03        | 9.35%      |
| South Korea      | 100.22        | 7.94%      |
| Malaysia         | 94.15         | 7.46%      |
| Russian          | 82.85         | 6.56%      |
| Indonesia        | 81.15         | 6.43%      |
| Thailand         | 80.14         | 6.35%      |
| U.S.             | 37.74         | 2.99%      |
| Others           | 393.22        | 29.56%     |

Source: [2].

**Table S15.** The import volume of China's agricultural products from 1995 to 2015 (Unit: 10<sup>4</sup> t).

| Year | Corn   | Rice    | Wheat   | Sugar | Tuber  | Oil crops | Bean   | Fruits | Vegetables | Beef  | Pork   | Mutton | Poultry | Milk   | Egg  |
|------|--------|---------|---------|-------|--------|-----------|--------|--------|------------|-------|--------|--------|---------|--------|------|
| 1995 | 526.55 | 164.53  | 1349.48 | 0.02  | 45.78  | 41.72     | 1.00   | 23.72  | 1.03       | 0.90  | 1.72   | 0.17   | 26.41   | 7.22   | 0.25 |
| 1996 | 44.91  | 77.71   | 961.55  | 0.01  | 8.06   | 112.21    | 19.31  | 64.54  | 2.14       | 1.03  | 0.36   | 0.33   | 31.51   | 7.75   | 0.05 |
| 1997 | 1.52   | 35.96   | 380.70  | 0.02  | 27.88  | 297.02    | 12.53  | 76.47  | 3.86       | 0.79  | 0.66   | 0.41   | 21.18   | 11.36  | 0.08 |
| 1998 | 25.37  | 26.04   | 337.32  | 0.05  | 30.17  | 461.47    | 10.19  | 75.89  | 4.85       | 1.52  | 2.67   | 0.92   | 19.55   | 11.08  | 0.05 |
| 1999 | 8.22   | 19.21   | 312.89  | 0.09  | 37.30  | 694.14    | 5.68   | 68.66  | 5.68       | 2.46  | 13.48  | 1.05   | 80.08   | 16.34  | 0.03 |
| 2000 | 0.55   | 24.88   | 289.67  | 0.04  | 25.69  | 1340.48   | 10.58  | 98.40  | 4.84       | 3.85  | 23.81  | 1.79   | 85.22   | 21.88  | 0.03 |
| 2001 | 4.26   | 29.45   | 311.08  | 0.02  | 195.06 | 1570.76   | 17.07  | 96.35  | 2.95       | 3.69  | 20.43  | 2.54   | 70.71   | 19.56  | 0.02 |
| 2002 | 0.98   | 24.14   | 260.36  | 0.08  | 176.11 | 1195.37   | 12.62  | 101.69 | 2.61       | 5.27  | 21.96  | 3.50   | 57.63   | 26.38  | 0.02 |
| 2003 | 0.18   | 26.04   | 182.77  | 0.06  | 236.84 | 2099.53   | 6.92   | 107.94 | 2.65       | 6.97  | 31.21  | 3.44   | 64.62   | 31.50  | 0.02 |
| 2004 | 0.55   | 76.54   | 898.24  | 0.09  | 344.31 | 2078.39   | 9.80   | 114.06 | 2.73       | 6.14  | 29.11  | 3.31   | 18.74   | 34.72  | 0.00 |
| 2005 | 1.07   | 53.07   | 573.85  | 0.04  | 333.67 | 2705.77   | 27.21  | 118.43 | 2.96       | 2.07  | 20.01  | 4.14   | 38.60   | 32.00  | 0.00 |
| 2006 | 7.14   | 73.99   | 277.12  | 0.08  | 495.06 | 2930.04   | 36.79  | 130.31 | 5.09       | 1.23  | 21.90  | 3.68   | 59.03   | 34.78  | 0.00 |
| 2007 | 4.30   | 49.60   | 102.38  | 0.15  | 462.20 | 3193.12   | 31.77  | 139.51 | 2.76       | 1.45  | 47.67  | 4.66   | 80.64   | 29.86  | 0.00 |
| 2008 | 5.34   | 34.26   | 114.64  | 0.20  | 197.94 | 3902.60   | 35.04  | 174.66 | 2.85       | 1.10  | 93.26  | 5.55   | 83.67   | 35.06  | 0.01 |
| 2009 | 8.67   | 38.03   | 269.78  | 0.25  | 610.88 | 4635.90   | 42.10  | 237.52 | 2.75       | 2.99  | 52.79  | 6.82   | 74.98   | 59.70  | 0.00 |
| 2010 | 158.43 | 47.93   | 365.55  | 0.22  | 576.41 | 5706.23   | 68.44  | 264.45 | 3.62       | 5.89  | 90.26  | 5.88   | 54.21   | 74.54  | 0.01 |
| 2011 | 175.79 | 59.81   | 309.05  | 0.25  | 502.75 | 5469.43   | 79.00  | 323.50 | 3.00       | 5.45  | 136.67 | 8.31   | 42.11   | 90.60  | 0.01 |
| 2012 | 520.86 | 246.16  | 631.24  | 0.34  | 713.84 | 6230.16   | 74.23  | 328.65 | 2.95       | 10.52 | 135.92 | 13.29  | 52.19   | 114.58 | 0.00 |
| 2013 | 326.75 | 332.80  | 796.41  | 0.49  | 738.94 | 6786.67   | 110.60 | 315.69 | 2.40       | 33.36 | 140.00 | 25.89  | 58.43   | 159.22 | 0.00 |
| 2014 | 260.13 | 836.23  | 854.64  | 0.58  | 865.13 | 7755.23   | 86.30  | 387.57 | 2.34       | 37.68 | 138.36 | 28.32  | 46.90   | 181.30 | 0.00 |
| 2015 | 473.17 | 1407.96 | 1389.45 | 0.66  | 937.66 | 8759.60   | 100.19 | 434.06 | 2.95       | 54.43 | 159.31 | 22.37  | 40.86   | 161.06 | 0.00 |

Source: [2].

**Table S16.** The major import trading partners in 2015 (Unit: 10<sup>4</sup> t).

| Country (region) | Import volume | Proportion |
|------------------|---------------|------------|
| Brazil           | 4043.14       | 29.01%     |
| America          | 3928.05       | 28.18%     |
| Argentina        | 970.20        | 6.96%      |
| Thailand         | 902.45        | 6.47%      |
| Australian       | 832.86        | 5.98%      |
| Canada           | 832.30        | 5.97%      |
| Vietnam          | 497.72        | 3.57%      |
| Ukraine          | 468.06        | 3.36%      |
| French           | 463.58        | 3.33%      |
| Others           | 1000.39       | 7.18%      |

Source: [2].

**Table S17.** Carbon emission factors (CEFs) of China's trading partners of agricultural products provided by FAO (Unit: t of CO<sub>2</sub>-eq/t product).

| Country<br>(region)                   | Corn | Rice  | Sugar | Wheat | Fruit | Oil crops | Beans | Tubers | Vegetables | Milk  | Beef  | Pork  | Mutton | Poultry | Eggs |
|---------------------------------------|------|-------|-------|-------|-------|-----------|-------|--------|------------|-------|-------|-------|--------|---------|------|
| Afghanistan                           | 0.29 | 1.98  | 0.03  | 0.31  | 0.39  | 0.44      | 0.17  | 0.07   | 0.18       | 8.79  | 8.77  | -     | 20.30  | 1.95    | 5.49 |
| Bahrain                               | -    | -     | -     | -     | 5.18  | -         | 0.12  | 0.97   | 1.04       | 1.47  | 14.53 | -     | 17.47  | 0.98    | 0.87 |
| Bangladesh                            | 0.18 | 1.50  | 0.06  | 0.49  | 0.60  | 0.60      | 0.32  | 0.14   | 0.44       | 18.36 | 22.36 | -     | 47.26  | 2.84    | 7.94 |
| Bhutan                                | 0.24 | 1.88  | 0.04  | 0.36  | 0.42  | 0.38      | 0.13  | 0.09   | 0.44       | 14.65 | 18.57 | 5.40  | 32.53  | 2.18    | 5.29 |
| Brunei                                |      |       |       |       |       |           |       |        |            |       |       |       |        |         |      |
| Darussalam                            | -    | 30.93 | -     | -     | 3.70  | 2.90      | -     | 1.04   | 6.20       | 12.97 | 20.18 | 13.72 | 18.30  | 2.21    | 3.03 |
| Myanmar                               | 0.11 | 1.54  | 0.01  | 0.22  | 0.35  | 0.22      | 0.08  | 0.05   | 0.08       | 11.24 | 20.38 | 4.89  | 33.79  | 1.56    | 1.96 |
| Cambodia                              | 0.12 | 2.33  | 0.04  | -     | 0.41  | 0.30      | 0.15  | 0.04   | 0.25       | 35.87 | 25.47 | 9.60  | -      | 1.99    | 4.77 |
| Cyprus                                | -    | -     | -     | 0.94  | 1.40  | 1.80      | 0.70  | 0.18   | 0.21       | 0.79  | 11.75 | 3.40  | 16.31  | 0.98    | 0.71 |
| Democratic<br>People's<br>Republic of |      |       |       |       |       |           |       |        |            |       |       |       |        |         |      |
| Korea                                 | 0.08 | 1.59  | -     | 0.11  | 0.14  | 0.20      | 0.07  | 0.03   | 0.06       | 2.07  | 20.38 | 4.44  | 21.65  | 1.42    | 1.47 |
| China, Hong<br>Kong SAR               | -    | -     | -     | -     | 1.13  | -         | -     | 0.48   | 0.42       | 1.55  | 3.05  | 2.96  | -      | 1.56    | 2.48 |
| India                                 | 0.52 | 2.05  | 0.04  | 0.37  | 0.46  | 0.78      | 0.43  | 0.09   | 0.24       | 2.99  | 15.40 | 10.08 | 27.32  | 1.66    | 1.10 |
| Indonesia                             | 0.23 | 1.97  | 0.04  | -     | 0.21  | 0.07      | 0.24  | 0.10   | 0.33       | 3.19  | 13.55 | 7.79  | 33.08  | 2.70    | 2.65 |
| Iran (Islamic<br>Republic of)         | 0.26 | 3.07  | 0.09  | 0.96  | 0.79  | 0.74      | 0.89  | 0.13   | 0.24       | 2.23  | 17.72 | -     | 18.52  | 1.65    | 1.14 |
| Iraq                                  | 0.58 | 4.05  | 0.11  | 0.66  | 1.15  | 0.50      | 0.41  | 0.19   | 0.33       | 4.48  | 8.26  | -     | 15.57  | 1.46    | 1.18 |
| Israel                                | 0.15 | -     | -     | 1.93  | 0.88  | 1.12      | 0.25  | 0.21   | 0.46       | 0.27  | 4.98  | 4.61  | 14.15  | 1.30    | 0.79 |

|                                        |      |      |      |       |        |      |      |      |      |       |       |       |       |      |       |
|----------------------------------------|------|------|------|-------|--------|------|------|------|------|-------|-------|-------|-------|------|-------|
| Japan                                  | 1.18 | 2.44 | 0.10 | 0.96  | 0.88   | 1.87 | 0.52 | 0.21 | 0.33 | 0.65  | 7.26  | 3.21  | 19.24 | 1.04 | 14.95 |
| Jordan                                 | 0.23 | -    | -    | 5.84  | 1.72   | 1.69 | 1.12 | 0.25 | 0.37 | 0.43  | 8.72  | -     | 25.95 | 1.46 | 0.37  |
| Kuwait                                 | 0.44 | -    | -    | 3.80  | 7.49   | 4.98 | -    | 0.55 | 0.53 | 0.54  | 10.90 | -     | 18.32 | 0.98 | 1.58  |
| Lao People's<br>Democratic<br>Republic | 0.11 | 1.28 | 0.04 | -     | 0.29   | 0.27 | 0.14 | 0.08 | 0.27 | 28.40 | 24.45 | 14.11 | -     | 2.48 | 2.24  |
| Lebanon                                | 0.24 | -    | 0.08 | 0.32  | 0.32   | 0.45 | 0.15 | 0.07 | 0.10 | 0.70  | 7.93  | 7.92  | 14.68 | 0.61 | 0.54  |
| China, Macao<br>SAR                    | -    | -    | -    | -     | -      | -    | -    | -    | -    | -     | -     | -     | -     | 1.74 | 2.65  |
| Malaysia                               | 0.22 | 2.47 | 0.04 | -     | 0.56   | 0.05 | -    | 0.11 | 0.19 | 13.77 | 26.95 | 7.82  | 20.80 | 1.17 | 1.70  |
| Maldives                               | 0.02 | -    | -    | -     | 0.01   | -    | 0.01 | 0.01 | 0.04 | -     | -     | -     | -     | -    | -     |
| Mongolia                               | -    | -    | -    | 10.26 | 159.17 | 9.92 | 4.29 | 2.48 | 4.41 | 9.94  | 26.93 | 7.36  | 17.65 | 1.11 | 2.40  |
| Nepal                                  | 0.26 | 1.76 | 0.03 | 0.30  | 0.27   | 0.44 | 0.19 | 0.08 | 0.14 | 8.48  | 18.57 | 7.84  | 36.08 | 1.88 | 2.45  |
| Oman                                   | -    | -    | 0.51 | 1.75  | 3.10   | -    | -    | 0.33 | 1.06 | 5.33  | -     | -     | 10.48 | 1.83 | 0.62  |
| Pakistan                               | 0.39 | 2.41 | 0.06 | 0.52  | 0.85   | 0.90 | 0.55 | 0.12 | 0.33 | 3.06  | 8.11  | -     | 22.00 | 1.71 | 2.41  |
| Occupied<br>Palestinian<br>Territory   | -    | -    | -    | 0.39  | 0.25   | 0.38 | 0.16 | 0.02 | 0.03 | 0.58  | 8.51  | -     | 9.89  | 0.86 | 0.56  |
| Philippines                            | 0.15 | 3.35 | 0.01 | -     | 0.13   | 0.11 | 0.13 | 0.08 | 0.13 | 2.34  | 13.02 | 6.44  | 25.45 | 1.78 | 2.55  |
| Qatar                                  | 1.45 | -    | -    | 12.46 | 15.46  | -    | -    | 4.59 | 6.41 | 2.16  | 14.53 | -     | 20.96 | 1.05 | 0.63  |
| Saudi Arabia                           | 0.92 | -    | -    | 0.89  | 3.74   | 1.18 | 0.48 | 0.36 | 0.66 | 0.30  | 8.72  | -     | 15.57 | 1.46 | 0.83  |
| Singapore                              | -    | -    | -    | -     | 27.84  | 3.08 | -    | 2.66 | 4.10 | -     | -     | 7.76  | -     | 1.00 | 1.82  |
| Republic of<br>Korea                   | 0.89 | 2.69 | -    | 1.25  | 1.19   | 2.86 | 0.96 | 0.36 | 0.37 | 0.50  | 9.34  | 2.91  | 23.32 | 1.92 | 1.11  |
| Sri Lanka                              | 0.22 | 1.32 | 0.02 | -     | 0.38   | 0.15 | 0.13 | 0.08 | 0.18 | 5.85  | 11.60 | 5.56  | 16.54 | 1.71 | 1.42  |

|              |       |       |      |      |       |      |       |      |      |       |       |       |       |      |      |
|--------------|-------|-------|------|------|-------|------|-------|------|------|-------|-------|-------|-------|------|------|
| Syrian Arab  |       |       |      |      |       |      |       |      |      |       |       |       |       |      |      |
| Republic     | 0.20  | -     | 0.04 | 0.35 | 0.38  | 0.49 | 0.23  | 0.08 | 0.13 | 1.09  | 11.62 | -     | 7.78  | 1.06 | 0.89 |
| Thailand     | 0.19  | 2.63  | 0.02 | 0.78 | 0.43  | 0.08 | 0.23  | 0.06 | 0.32 | 1.97  | 10.08 | 3.05  | 24.49 | 1.58 | 1.73 |
| Turkey       | 0.15  | 1.59  | 0.04 | 0.43 | 0.38  | 0.39 | 0.21  | 0.06 | 0.14 | 1.73  | 14.11 | 3.50  | 20.30 | 0.86 | 0.81 |
| United Arab  |       |       |      |      |       |      |       |      |      |       |       |       |       |      |      |
| Emirates     | 0.10  | -     | -    | 0.88 | 3.03  | -    | -     | 0.18 | 0.27 | 2.86  | 6.97  | -     | 17.47 | 1.22 | 0.77 |
| Yemen        | 2.31  | -     | -    | 1.90 | 1.56  | 2.18 | 0.52  | 0.48 | 0.92 | 4.79  | 19.16 | -     | 30.83 | 1.61 | 1.28 |
| Viet Nam     | 0.21  | 1.59  | 0.03 | -    | 0.35  | 0.26 | 0.30  | 0.10 | 0.23 | 2.36  | 17.76 | 5.38  | -     | 1.32 | 2.98 |
| China        | 0.36  | 1.75  | 0.06 | 0.41 | 0.89  | 0.63 | 0.33  | 0.19 | 0.26 | 1.65  | 21.71 | 2.89  | 20.82 | 1.13 | 1.14 |
| China,       |       |       |      |      |       |      |       |      |      |       |       |       |       |      |      |
| mainland     | 0.36  | 1.75  | 0.06 | 0.41 | 0.90  | 0.63 | 0.34  | 0.20 | 0.26 | 1.66  | 21.71 | 2.90  | 20.82 | 1.13 | 1.13 |
| China,       |       |       |      |      |       |      |       |      |      |       |       |       |       |      |      |
| Taiwan       |       |       |      |      |       |      |       |      |      |       |       |       |       |      |      |
| Province of  | 0.22  | 1.64  | 0.05 | 0.32 | 0.46  | 0.25 | 0.17  | 0.12 | 0.25 | 0.78  | 15.51 | 2.26  | -     | 0.94 | 1.20 |
| Timor-Leste  | 0.15  | 2.20  | -    | -    | 0.14  | 0.27 | 0.06  | 0.11 | 0.29 | -     | -     | 10.71 | 32.77 | 2.49 | 1.59 |
| Kazakhstan   | 0.07  | 2.31  | 0.04 | 0.28 | 0.34  | 0.26 | 0.08  | 0.03 | 0.04 | 2.14  | 19.59 | 3.42  | 18.45 | 1.04 | 0.87 |
| Kyrgyzstan   | 0.13  | 2.91  | 0.16 | 0.31 | 0.93  | 0.37 | 0.13  | 0.09 | 0.14 | 2.39  | 17.45 | 3.25  | 15.54 | 1.13 | 1.57 |
| Tajikistan   | 0.11  | 2.37  | -    | 0.35 | 1.50  | 1.21 | 0.10  | 0.08 | 0.13 | 7.78  | 17.29 | 5.45  | 21.65 | 1.82 | 2.20 |
| Turkmenistan | 1.36  | 6.03  | 0.31 | 0.62 | 0.56  | 2.54 | 0.25  | 0.45 | 0.24 | 2.36  | 16.98 | 3.92  | 21.65 | 1.24 | 0.70 |
| Uzbekistan   | 0.39  | 2.81  | -    | 0.61 | 1.60  | 2.47 | 0.38  | 0.20 | 0.27 | 2.85  | 16.98 | 3.17  | 17.09 | 1.11 | 1.24 |
| Algeria      | 0.18  | 7.09  | -    | 0.39 | 0.47  | 0.29 | 0.17  | 0.04 | 0.12 | 1.37  | 8.90  | 11.02 | 18.37 | 1.26 | 1.73 |
| Angola       | 4.46  | 30.01 | 0.17 | 3.05 | 0.92  | 1.95 | 2.28  | 0.39 | 2.53 | 5.89  | 10.20 | 6.78  | 20.82 | 1.40 | 1.39 |
| Benin        | 0.44  | 0.92  | 0.04 | -    | 0.34  | 0.27 | 0.15  | 0.07 | 0.36 | 21.73 | 15.76 | 17.59 | 31.54 | 1.57 | 1.61 |
| Botswana     | 36.00 | -     | -    | -    | 14.07 | 7.29 | 11.11 | 1.51 | 3.97 | 8.07  | 8.67  | 12.97 | 22.31 | 1.83 | 1.36 |
| Burundi      | 0.41  | 1.07  | 0.02 | 0.47 | 0.36  | 0.12 | 0.12  | 0.10 | 0.13 | 8.23  | 8.67  | 5.48  | 26.03 | 1.40 | 1.93 |
| Cameroon     | 0.32  | 1.51  | 0.14 | 0.51 | 0.24  | 0.19 | 0.17  | 0.11 | 0.60 | 4.91  | 11.94 | 14.70 | 26.03 | 1.57 | 2.10 |

|                    |      |       |      |      |      |      |       |      |      |       |       |       |       |      |      |
|--------------------|------|-------|------|------|------|------|-------|------|------|-------|-------|-------|-------|------|------|
| Cabo Verde         | 2.83 | -     | 0.09 | -    | 0.24 | 0.31 | 1.38  | 0.12 | 0.10 | 4.48  | 12.83 | 8.82  | 19.53 | 1.86 | 1.40 |
| Central<br>African |      |       |      |      |      |      |       |      |      |       |       |       |       |      |      |
| Republic           | 7.53 | 14.50 | 1.99 | -    | 7.41 | 4.91 | 1.53  | 2.96 | 3.17 | 10.79 | 11.24 | 15.47 | 20.82 | 1.47 | 1.82 |
| Chad               | 1.65 | 4.40  | 0.04 | 0.71 | 2.34 | 1.51 | 0.66  | 0.41 | 0.57 | 10.46 | 14.44 | 17.66 | 17.72 | 1.79 | 2.02 |
| Comoros            | 0.10 | 7.84  | -    | -    | 0.19 | 0.14 | 0.06  | 0.08 | 0.10 | 5.65  | 15.76 | -     | 20.81 | 1.57 | 1.83 |
| Congo              | 2.02 | 11.07 | 0.10 | -    | 1.19 | 0.83 | 0.55  | 0.30 | 0.56 | 5.65  | 11.07 | 9.30  | 31.24 | 1.26 | 2.14 |
| Djibouti           | 9.46 | -     | -    | -    | -    | -    | 10.78 | -    | 5.70 | 8.07  | 15.76 | -     | 30.32 | -    | -    |
| Egypt              | 0.29 | 1.68  | 0.04 | 0.37 | 0.51 | 0.59 | 0.20  | 0.15 | 0.27 | 1.55  | 5.48  | 18.00 | 8.42  | 0.91 | 0.79 |
| Equatorial         |      |       |      |      |      |      |       |      |      |       |       |       |       |      |      |
| Guinea             | -    | -     | -    | -    | 0.03 | 0.01 | -     | 0.02 | -    | -     | -     | 9.80  | 28.40 | 1.56 | 1.16 |
| Ethiopia           | 0.65 | 4.10  | 0.02 | 0.80 | 0.80 | 0.96 | 0.31  | 0.35 | 1.15 | 9.25  | 15.87 | 8.82  | 31.24 | 1.57 | 1.66 |
| Gabon              | 0.47 | 1.54  | 0.03 | -    | 0.70 | 0.40 | 0.24  | 0.23 | 0.55 | 11.30 | 13.13 | 15.75 | 26.03 | 1.57 | 1.39 |
| Gambia             | 0.47 | 9.09  | -    | -    | 0.52 | 0.39 | 0.67  | 0.29 | 0.25 | 16.14 | 14.44 | 12.31 | 28.67 | 1.26 | 1.72 |
| Ghana              | 0.29 | 1.51  | 0.04 | -    | 0.20 | 0.20 | 1.41  | 0.07 | 0.18 | 21.73 | 13.87 | 10.50 | 21.03 | 1.71 | 2.75 |
| Guinea             | 0.66 | 3.17  | 0.03 | -    | 0.93 | 0.50 | 0.25  | 0.21 | 0.86 | 15.27 | 18.56 | 10.30 | 26.03 | 1.26 | 2.08 |
| Guinea-            |      |       |      |      |      |      |       |      |      |       |       |       |       |      |      |
| Bissau             | 0.70 | 2.14  | 0.06 | -    | 0.77 | 0.27 | 0.44  | 0.17 | 0.41 | 16.62 | 15.76 | 11.02 | 32.85 | 1.80 | 1.52 |
| Côte d'Ivoire      | 0.14 | 0.97  | 0.01 | -    | 0.31 | 0.05 | 0.08  | 0.07 | 0.21 | 20.14 | 16.03 | 13.48 | 21.90 | 1.77 | 1.89 |
| Kenya              | 1.28 | 3.77  | 0.04 | 1.02 | 0.43 | 2.04 | 0.99  | 0.19 | 0.32 | 4.84  | 7.38  | 5.38  | 21.25 | 1.02 | 1.48 |
| Liberia            | -    | 0.83  | 0.04 | -    | 0.16 | 0.02 | 0.08  | 0.04 | 0.12 | 21.74 | 13.86 | 11.02 | 31.24 | 1.57 | 1.46 |
| Libya              | 1.06 | -     | -    | 3.41 | 2.20 | 2.38 | 0.44  | 0.21 | 0.55 | 2.68  | 9.59  | -     | 20.82 | 0.97 | 1.15 |
| Madagascar         | 0.94 | 3.42  | 0.10 | 0.59 | 1.34 | 1.27 | 0.36  | 0.34 | 0.68 | 9.27  | 13.59 | 6.30  | 26.03 | 1.57 | 1.69 |
| Malawi             | 0.15 | 1.52  | 0.01 | 0.21 | 0.15 | 0.23 | 0.12  | 0.03 | 0.23 | 5.86  | 13.97 | 21.83 | 28.92 | 1.56 | 1.69 |
| Mali               | 0.40 | 2.36  | 0.04 | 0.46 | 1.06 | 0.91 | 0.75  | 0.12 | 0.36 | 11.53 | 13.33 | 12.31 | 25.23 | 1.57 | 4.04 |
| Mauritania         | 7.38 | 5.40  | -    | 2.14 | 8.02 | 4.52 | 2.70  | 3.48 | 5.20 | 8.07  | 14.44 | -     | 21.03 | 1.57 | 2.14 |



|                                        |      |      |      |       |       |      |      |      |      |       |       |       |       |      |      |
|----------------------------------------|------|------|------|-------|-------|------|------|------|------|-------|-------|-------|-------|------|------|
| Mauritius                              | 0.12 | -    | 0.03 | -     | 0.29  | 0.38 | -    | 0.08 | 0.22 | 2.58  | -     | 6.36  | 19.78 | 1.14 | 0.82 |
| Morocco                                | 1.14 | 1.91 | 0.03 | 0.50  | 0.49  | 0.65 | 0.38 | 0.09 | 0.12 | 2.28  | 8.95  | 8.82  | 21.84 | 1.06 | 1.29 |
| Mozambique                             | 1.10 | 5.68 | 0.04 | 0.90  | 0.86  | 1.91 | 0.86 | 0.39 | 0.72 | 16.62 | 11.55 | 7.35  | 26.03 | 1.40 | 1.50 |
| Namibia                                | 4.21 | -    | -    | 1.37  | 11.13 | 8.33 | 1.90 | 1.95 | 3.46 | 5.65  | 7.02  | 8.02  | 17.35 | 1.57 | 2.27 |
| Niger                                  | 0.37 | 2.90 | 0.01 | 0.21  | 0.28  | 0.36 | 0.41 | 0.03 | 0.09 | 8.56  | 16.20 | 10.95 | 19.71 | 1.57 | 2.41 |
| Nigeria                                | 0.16 | 2.39 | 0.04 | 0.21  | 0.28  | 0.16 | 0.09 | 0.06 | 0.15 | 11.77 | 13.33 | 9.80  | 28.67 | 1.26 | 1.60 |
| Réunion                                | 0.15 | 2.44 | 0.03 | -     | 0.75  | 0.73 | 0.34 | 0.15 | 0.59 | 3.01  | 7.22  | 4.90  | 26.45 | 1.23 | 0.66 |
| Rwanda                                 | 0.23 | 0.64 | 0.03 | 0.26  | 0.24  | 0.49 | 0.12 | 0.08 | 0.15 | 5.45  | 16.67 | 10.50 | 26.03 | 1.39 | 2.40 |
| Sao Tome and<br>Principe               | 0.07 | -    | -    | -     | 0.05  | 0.03 | -    | 0.02 | 0.03 | 16.62 | 9.84  | 8.94  | 31.20 | 1.57 | 1.54 |
| Senegal                                | 0.66 | 1.48 | 0.02 | -     | 0.71  | 0.66 | 0.69 | 0.18 | 0.26 | 13.53 | 11.70 | 12.04 | 25.03 | 1.08 | 1.91 |
| Seychelles                             | -    | -    | -    | -     | 0.19  | 0.23 | -    | 0.09 | 0.45 | 5.12  | 7.64  | 5.90  | -     | 1.26 | 0.72 |
| Sierra Leone                           | 0.35 | 1.72 | 0.01 | -     | 0.28  | 0.09 | 0.11 | 0.07 | 0.14 | 11.30 | 19.26 | 7.59  | 28.67 | 1.40 | 3.17 |
| Somalia                                | 2.79 | 5.29 | 0.25 | 12.33 | 2.29  | 2.55 | 3.85 | 0.92 | 3.14 | 7.57  | 15.76 | 8.82  | 24.26 | 1.57 | 2.70 |
| South Africa                           | 0.52 | 6.20 | 0.10 | 0.87  | 0.60  | 1.03 | 0.48 | 0.18 | 0.44 | 0.91  | 6.46  | 3.39  | 13.12 | 0.88 | 0.66 |
| Sudan<br>(former)                      | 1.38 | 3.36 | 0.05 | 1.57  | 1.00  | 2.22 | 0.98 | 0.60 | 0.54 | 7.72  | 14.28 | -     | 25.03 | 1.26 | 1.43 |
| United<br>Republic of<br>Tanzania      | 0.85 | 4.78 | 0.02 | 1.75  | 0.98  | 1.02 | 0.27 | 0.39 | 0.53 | 11.98 | 16.02 | 11.02 | 26.03 | 1.38 | 2.80 |
| Togo                                   | 0.37 | 0.65 | -    | -     | 0.31  | 0.25 | 0.31 | 0.11 | 0.28 | 12.56 | 13.87 | 15.75 | 28.67 | 1.57 | 1.46 |
| Tunisia                                | -    | -    | -    | 0.27  | 0.48  | 1.01 | 0.14 | 0.07 | 0.08 | 1.62  | 10.20 | 9.75  | 24.21 | 0.93 | 1.64 |
| Uganda                                 | 0.29 | 1.86 | 0.02 | 0.44  | 0.63  | 0.51 | 0.34 | 0.16 | 0.56 | 8.07  | 11.59 | 7.35  | 22.31 | 0.97 | 1.46 |
| Democratic<br>Republic of<br>the Congo | 1.92 | 7.00 | 0.07 | 1.19  | 1.25  | 0.69 | 0.82 | 0.33 | 0.84 | 3.72  | 11.12 | 1-    | 30.93 | 2.08 | 2.34 |

|                |      |      |      |      |      |      |      |       |       |       |       |       |       |      |       |
|----------------|------|------|------|------|------|------|------|-------|-------|-------|-------|-------|-------|------|-------|
| Burkina Faso   | 0.54 | 4.57 | 0.02 | -    | 0.67 | 0.85 | 0.44 | 0.16  | 0.29  | 24.94 | 15.34 | 20.52 | 35.04 | 1.57 | 2.08  |
| Zambia         | 2.11 | 9.47 | 0.09 | 0.79 | 4.41 | 4.25 | 2.44 | 1.48  | 2.08  | 9.42  | 10.83 | 10.02 | 22.31 | 1.26 | 1.62  |
| Zimbabwe       | 3.13 | 3.04 | 0.05 | 0.51 | 1.42 | 2.35 | 0.69 | 0.54  | 0.78  | 6.57  | 7.70  | 8.02  | 22.31 | 1.09 | 1.52  |
| Lesotho        | 3.83 | -    | -    | 4.70 | 2.21 | -    | 0.90 | 0.18  | 0.86  | 11.30 | -     | -     | 30.93 | 1.02 | 0.99  |
| Swaziland      | 1.61 | 2.19 | 0.04 | 1.20 | 1.10 | 2.62 | 0.97 | 0.65  | 0.92  | 9.75  | 7.65  | 8.82  | 17.35 | 1.26 | 1.46  |
| Eritrea        | 1.57 | -    | -    | 1.31 | 0.88 | 3.16 | 0.57 | 0.61  | 1.34  | 18.84 | 17.33 | -     | 31.54 | 1.48 | 1.82  |
| Belgium        | 0.31 | -    | 0.10 | 0.40 | 0.57 | 0.81 | 0.18 | 0.15  | 0.35  | 1.57  | 14.53 | 4.51  | 0.51  | 1.82 | 16.22 |
| Denmark        | -    | -    | 0.08 | 0.25 | 0.85 | 0.26 | 0.16 | 0.08  | 0.24  | 1.03  | 14.01 | 6.64  | 25.17 | 2.30 | 12.31 |
| United Kingdom | -    | -    | 0.08 | 0.34 | 0.91 | 0.40 | 0.20 | 0.10  | 0.37  | 1.19  | 10.82 | 5.55  | 25.55 | 1.91 | 19.63 |
| Germany        | 0.18 | -    | 0.06 | 0.23 | 0.55 | 0.21 | 0.16 | 0.07  | 0.17  | 1.27  | 11.58 | 4.73  | 24.45 | 2.44 | 14.57 |
| France         | 0.17 | 3.71 | 0.04 | 0.22 | 0.78 | 0.25 | 0.09 | 0.06  | 0.22  | 1.48  | 13.46 | 5.08  | 32.97 | 2.27 | 17.30 |
| Ireland        | -    | -    | -    | 1.64 | 3.15 | 1.74 | 0.69 | 0.83  | 1.04  | 1.85  | 11.33 | 5.45  | 25.30 | 2.74 | 24.98 |
| Italy          | 0.17 | 3.09 | 0.06 | 0.43 | 0.52 | 0.44 | 0.22 | 0.11  | 0.17  | 1.57  | 11.25 | 4.09  | 60.83 | 1.72 | 22.19 |
| Luxembourg     | 0.63 | -    | -    | 0.59 | 1.37 | 0.49 | 0.28 | 0.20  | 0.28  | 1.26  | 10.38 | 6.17  | 27.16 | 1.67 | 15.72 |
| Netherlands    | 1.18 | -    | 0.44 | 1.72 | 2.22 | 2.87 | 1.16 | 0.60  | 0.87  | 1.21  | 18.71 | 5.22  | 24.10 | 1.79 | 14.40 |
| Greece         | 0.14 | 2.93 | 0.05 | 0.55 | 0.51 | 0.49 | 0.21 | 0.10  | 0.15  | 2.52  | 17.79 | 9.98  | 47.76 | 1.97 | 30.56 |
| Portugal       | 0.22 | 3.68 | 0.04 | 0.89 | 1.50 | 1.02 | 0.56 | 0.18  | 0.15  | 1.27  | 16.66 | 9.55  | 49.18 | 2.15 | 15.91 |
| Spain          | 0.09 | 2.50 | -    | 0.34 | 0.51 | 0.30 | 0.27 | 0.05  | 0.08  | 1.31  | 14.42 | 6.20  | 47.31 | 1.62 | 16.92 |
| Albania        | 0.32 | -    | 0.19 | 0.45 | 1.17 | 0.78 | 0.40 | 0.14  | 0.24  | 2.77  | 34.35 | 4.46  | 58.88 | 3.87 | 34.83 |
| Austria        | 0.13 | -    | 0.04 | 0.29 | 0.40 | 0.32 | 0.17 | 0.07  |       | 1.46  | 11.23 | 4.58  | 22.61 | 2.05 | 16.68 |
| Bulgaria       | 0.14 | 1.67 | -    | 0.21 | 1.30 | 0.16 | 0.15 | 0.07  | 0.12  | 2.05  | 25.15 | 3.95  | 56.37 | 1.83 | 22.07 |
| Finland        | -    | -    | 0.14 | 0.60 | 4.37 | 0.70 | 0.25 | 0.15  | 0.26  | 1.10  | 12.07 | 5.04  | 27.77 | 1.60 | 15.06 |
| Hungary        | 0.12 | 2.63 | 0.03 | 0.20 | 0.39 | 0.16 | 0.12 | 0.05  | 0.12  | 1.29  | 14.41 | 3.14  | 50.47 | 1.67 | 23.53 |
| Iceland        | -    | -    | -    | -    | -    | -    | -    | 84.78 | 17.69 | 1.86  | 19.61 | 5.81  | 31.16 | 1.89 | 18.35 |
| Liechtenstein  | -    | -    | -    | -    | -    | -    | -    | -     | -     | 1.99  | -     | -     | -     | -    | -     |

|                        |      |      |      |      |       |      |      |      |      |      |       |      |       |      |       |
|------------------------|------|------|------|------|-------|------|------|------|------|------|-------|------|-------|------|-------|
| Malta                  | -    | -    | -    | 0.23 | 1.29  | 1.13 | 0.11 | 0.13 | 0.23 | 1.78 | 15.71 | 8.69 | 30.93 | 1.77 | 17.66 |
| Norway                 | -    | -    | -    | 2.09 | 5.40  | 2.22 | 0.61 | 0.51 | 0.87 | 1.42 | 13.39 | 5.42 | 24.93 | -    | 18.35 |
| Poland                 | 0.23 | -    | 0.06 | 0.35 | 0.74  | 0.23 | 0.17 | 0.13 | 0.16 | 1.46 | 17.95 | 3.38 | 55.20 | 1.74 | 22.45 |
| Romania                | 0.16 | 1.97 | 0.03 | 0.22 | 0.36  | 0.17 | 0.14 | 0.06 | 0.11 | 2.02 | 22.90 | 3.54 | 49.99 | 1.89 | 41.67 |
| Sweden                 | -    | -    | 0.06 | 0.28 | 2.15  | 0.29 | 0.15 | 0.09 | 0.33 | 1.05 | 11.55 | 5.01 | 25.81 | 2.02 | 13.90 |
| Switzerland            | 0.38 | -    | 0.10 | 0.67 | 0.87  | 0.65 | 0.28 | 0.15 | 0.48 | 1.30 | 16.65 | 5.04 | 22.81 | 2.27 | 14.79 |
| Estonia                | -    | -    | -    | 0.96 | 12.61 | 0.86 | 0.50 | 0.33 | 0.38 | 1.01 | 17.62 | 3.79 | 27.59 | 1.73 | 15.24 |
| Latvia                 | -    | -    | -    | 0.49 | 2.92  | 0.41 | 0.23 | 0.18 | 0.29 | 1.44 | 20.61 | 3.80 | 23.05 | 1.81 | 12.44 |
| Lithuania              | 0.23 | -    | 0.05 | 0.24 | 1.35  | 0.23 | 0.15 | 0.12 | 0.13 | 1.47 | 16.86 | 3.60 | 34.87 | 1.73 | 21.04 |
| Georgia                | 0.49 | -    | -    | 1.10 | 1.52  | 1.79 | 0.16 | 0.17 | 0.40 | 4.93 | 42.57 | 6.54 | 18.35 | 1.22 | 1.11  |
| Armenia                | 0.14 | -    | 0.10 | 0.36 | 0.37  | -    | 0.08 | 0.07 | 0.07 | 2.36 | 27.02 | 2.74 | 19.80 | 1.49 | 0.79  |
| Azerbaijan             | 0.26 | 5.11 | 0.11 | 0.49 | 0.87  | 0.62 | 0.17 | 0.15 | 0.27 | 4.30 | 27.36 | 4.29 | 22.24 | 1.31 | 1.85  |
| Belarus                | 0.45 | -    | 0.10 | 0.62 | 1.41  | 0.67 | 0.23 | 0.20 | 0.24 | 1.55 | 21.76 | 3.90 | 26.49 | 2.36 | 19.80 |
| Republic of<br>Moldova | 0.10 | -    | 0.03 | 0.12 | 0.28  | 0.10 | 0.07 | 0.05 | 0.09 | 2.08 | 28.71 | 3.52 | 33.12 | 2.01 | 23.81 |
| Russian<br>Federation  | 0.19 | 2.16 | 0.04 | 0.29 | 0.48  | 0.28 | 0.10 | 0.08 | 0.10 | 1.89 | 20.15 | 3.51 | 29.94 | 1.91 | 18.14 |
| Ukraine                | 0.09 | 1.80 | 0.03 | 0.15 | 0.31  | 0.14 | 0.07 | 0.05 | 0.09 | 1.73 | 24.23 | 3.22 | 33.12 | 1.61 | 26.75 |
| Slovenia               | 0.33 | -    | -    | 0.66 | 1.16  | 0.64 | 0.35 | 0.20 | 0.41 | 1.21 | 13.26 | 3.16 | 37.32 | 1.81 | 17.60 |
| Croatia                | 0.22 | -    | 0.07 | 0.32 | 1.22  | 0.38 | 0.25 | 0.15 | 0.28 | 1.88 | 22.31 | 3.91 | 44.16 | 3.07 | 32.45 |
| Czech<br>Republic      | 0.13 | -    | 0.04 | 0.22 | 0.81  | 0.21 | 0.14 | 0.07 | 0.18 | 0.99 | 13.05 | 3.30 | 34.19 | 2.13 | 18.45 |
| Slovakia               | 0.11 | -    | 0.03 | 0.18 | 0.64  | 0.16 | 0.12 | 0.07 | 0.20 | 1.21 | 14.72 | 3.10 | 62.34 | 1.91 | 24.36 |
| The former<br>Yugoslav | 0.14 | 1.74 | 0.05 | 0.22 | 0.33  | 0.20 | 0.09 | 0.08 | 0.14 | 2.26 | 27.58 | 3.00 | 30.45 | 3.69 | 27.46 |

|                                        |      |      |      |      |      |       |      |        |      |      |       |      |       |      |       |
|----------------------------------------|------|------|------|------|------|-------|------|--------|------|------|-------|------|-------|------|-------|
| Republic of<br>Macedonia               |      |      |      |      |      |       |      |        |      |      |       |      |       |      |       |
| Bosnia and<br>Herzegovina              | 0.12 | -    | -    | 0.16 | 1.08 | 0.24  | 0.09 | 0.09   | 0.31 | 2.57 | 23.32 | 4.35 | 32.91 | 2.11 | 45.93 |
| Faroe Islands                          | -    | -    | -    | -    | -    | -     | -    | 130.96 | -    | -    | -     | -    | 46.88 | -    | -     |
| Serbia                                 | 0.13 | -    | 0.03 | 0.20 | 0.76 | 0.18  | 0.07 | 0.11   | 0.26 | 2.41 | 16.72 | 6.25 | 27.46 | 1.78 | 39.74 |
| Montenegro                             | 0.30 | -    | -    | 0.31 | 1.27 | 1.37  | 0.13 | 0.13   | 0.17 | 3.30 | 21.44 | 2.57 | 0.53  | 2.09 | 36.34 |
| Antigua and<br>Barbuda                 | 1.29 | -    | -    | -    | 2.02 | 35.66 | -    | 1.09   | 1.56 | 4.58 | 16.45 | 5.94 | 26.20 | 1.74 | 2.83  |
| Argentina                              | 0.17 | 1.75 | 0.03 | 0.36 | 0.32 | 0.51  | 0.23 | 0.08   | 0.17 | 0.89 | 14.59 | 3.18 | 30.53 | 0.79 | 0.92  |
| Bahamas                                | 0.20 | -    | 0.10 | -    | 0.24 | -     | 0.50 | 0.53   | 0.68 | 4.40 | -     | 5.50 | 22.23 | 1.71 | 1.45  |
| Barbados                               | 0.34 | -    | 0.03 | -    | 0.57 | 0.32  | 0.14 | 0.11   | 0.26 | 2.45 | 15.93 | 3.45 | 8.98  | -    | -     |
| Belize                                 | 0.37 | 0.93 | 0.06 | -    | 0.31 | 0.55  | 0.31 | 0.17   | 0.34 | 4.55 | 15.05 | 4.40 | 15.80 | -    | -     |
| Bolivia<br>(Plurinational<br>State of) | 0.44 | 2.73 | 0.05 | 0.98 | 0.75 | 0.61  | 0.28 | 0.39   | 1.01 | 2.11 | 23.11 | 5.50 | 36.63 | 1.57 | 3.02  |
| Brazil                                 | 0.35 | 1.37 | 0.04 | 0.64 | 0.40 | 0.50  | 0.42 | 0.16   | 0.18 | 3.40 | 12.90 | 2.95 | 19.46 | 1.15 | 1.92  |
| Cayman<br>Islands                      | -    | -    | -    | -    | 2.38 | -     | -    | 0.89   | 0.97 | -    | -     | -    | -     | -    | -     |
| Chile                                  | 0.27 | 2.94 | 0.08 | 0.72 | 0.89 | 0.54  | 0.55 | 0.25   | 0.36 | 1.87 | 12.69 | 2.75 | 22.51 | 0.72 | 0.62  |
| Colombia                               | 1.10 | 3.48 | 0.07 | 1.80 | 1.19 | 0.16  | 0.63 | 0.40   | 0.56 | 3.71 | 14.51 | 3.53 | 21.48 | 2.07 | 0.88  |
| Dominica                               | 0.30 | -    | 0.04 | -    | 0.22 | 0.14  | 0.18 | 0.07   | 0.12 | 4.53 | 17.06 | 4.59 | 22.26 | 2.08 | 2.91  |
| Costa Rica                             | 0.72 | 1.32 | 0.04 | -    | 0.27 | 0.08  | 0.79 | 0.20   | 0.17 | 3.24 | 13.29 | 3.67 | 20.78 | 1.14 | 0.74  |
| Cuba                                   | 0.74 | 4.77 | 0.07 | -    | 0.69 | 0.52  | 0.41 | 0.30   | 0.38 | 2.96 | 18.71 | 5.14 | 20.76 | 1.89 | 1.27  |
| Dominican<br>Republic                  | 1.35 | 3.49 | 0.08 | -    | 0.46 | 0.33  | 0.53 | 0.43   | 0.47 | 3.02 | 15.66 | 4.02 | 25.95 | 1.68 | 0.86  |

|                          |      |       |      |      |      |       |      |      |      |       |       |      |       |      |      |
|--------------------------|------|-------|------|------|------|-------|------|------|------|-------|-------|------|-------|------|------|
| Ecuador                  | 0.45 | 2.45  | 0.03 | 1.16 | 0.23 | 0.12  | 0.99 | 0.36 | 1.23 | 0.86  | 15.05 | 3.06 | 22.24 | 0.97 | 0.73 |
| French                   |      |       |      |      |      |       |      |      |      |       |       |      |       |      |      |
| Guiana                   | 5.05 | 10.98 | 1.45 | -    | 2.76 | 1.35  | -    | 1.54 | 0.89 | 7.43  | 18.42 | 5.07 | 26.65 | 2.02 | 2.30 |
| Grenada                  | 0.46 | -     | 0.02 | -    | 0.37 | 0.15  | 0.08 | 0.16 | 0.12 | 5.57  | 19.74 | 5.45 | 15.71 | 1.89 | 1.52 |
| Guadeloupe               | -    | -     | 0.04 | -    | 0.29 | 0.75  | 0.93 | 0.19 | 0.39 | 5.74  | 14.64 | 4.23 | 18.75 | 1.59 | 1.38 |
| Guatemala                | 0.39 | 1.15  | 0.02 | 0.38 | 0.15 | 0.07  | 0.22 | 0.06 | 0.12 | 6.03  | 16.65 | 5.50 | 20.76 | 1.15 | 0.99 |
| Guyana                   | 1.72 | 3.83  | 0.11 | -    | 3.63 | 0.98  | 1.19 | 0.80 | 1.45 | 4.06  | 20.99 | 6.17 | 31.44 | 1.88 | 2.70 |
| Haiti                    | 0.61 | 2.28  | 0.02 | -    | 0.34 | 0.39  | 0.17 | 0.20 | 0.40 | 15.33 | 20.26 | 4.59 | 17.11 | 2.30 | 1.57 |
| Honduras                 | 0.58 | 0.80  | 0.02 | 1.78 | 0.24 | 0.06  | 0.40 | 0.20 | 0.12 | 3.37  | 25.57 | 2.76 | 20.75 | 1.47 | 1.19 |
| Jamaica                  | 5.45 | 5.15  | 0.30 | -    | 3.04 | 1.90  | 1.73 | 0.72 | 1.48 | 5.43  | 11.89 | 3.74 | 14.74 | 1.25 | 2.15 |
| Martinique               | -    | -     | 0.02 | -    | 0.07 | 0.38  | 0.21 | 0.11 | 0.10 | 0.76  | 19.03 | 5.40 | 16.47 | 1.81 | 0.53 |
| Mexico                   | 0.52 | 1.81  | 0.05 | 0.35 | 0.63 | 0.48  | 0.46 | 0.11 | 0.31 | 0.98  | 14.91 | 3.67 | 15.81 | 1.21 | 1.05 |
| Montserrat               | 0.87 | -     | -    | -    | 4.56 | 15.89 | -    | 3.23 | 7.71 | 5.87  | 17.06 | 5.51 | 20.37 | 1.78 | 2.56 |
| Nicaragua                | 0.84 | 1.07  | 0.03 | -    | 0.76 | 0.18  | 0.42 | 0.28 | 1.63 | 6.03  | 18.97 | 6.60 | 25.99 | 1.07 | 1.65 |
| Panama                   | 1.20 | 2.96  | 0.08 | -    | 0.49 | 0.27  | 1.24 | 0.41 | 0.49 | 4.08  | 14.15 | 3.72 | -     | 1.23 | 1.44 |
| Paraguay                 | 0.33 | 1.61  | 0.04 | 0.38 | 0.26 | 0.52  | 0.29 | 0.10 | 0.39 | 1.89  | 11.97 | 3.44 | 20.76 | 2.07 | 1.00 |
| Peru                     | 0.55 | 1.71  | 0.03 | 1.19 | 0.68 | 0.25  | 0.39 | 0.24 | 0.40 | 2.10  | 21.78 | 5.05 | 25.52 | 1.02 | 0.85 |
| Puerto Rico              | 1.60 | -     | -    | -    | 0.72 | 0.26  | 0.87 | 0.52 | 0.45 | 1.14  | 15.20 | 1.69 | 25.99 | 1.31 | 1.27 |
| Saint Lucia              | -    | -     | -    | -    | 0.33 | 0.23  | 0.08 | 0.32 | 0.21 | 3.16  | 16.87 | 5.73 | 15.72 | 1.73 | 1.68 |
| Saint Vincent<br>and the |      |       |      |      |      |       |      |      |      |       |       |      |       |      |      |
| Grenadines               | 0.01 | -     | 0.02 | -    | 0.11 | 0.09  | 0.05 | 0.08 | 0.07 | 3.26  | 16.97 | 4.59 | 23.96 | 2.07 | 1.43 |
| El Salvador              | 0.30 | 0.53  | 0.02 | -    | 0.36 | 0.17  | 0.32 | 0.14 | 0.16 | 2.23  | 18.56 | 6.14 | 20.73 | 1.52 | 1.02 |
| Suriname                 | 1.70 | 5.12  | 0.23 | -    | 0.77 | 0.82  | 1.02 | 0.32 | 0.76 | 1.44  | 17.41 | 4.62 | 26.22 | 1.22 | 3.54 |
| Trinidad and<br>Tobago   | 0.90 | 9.57  | -    | -    | 2.48 | 0.59  | 0.57 | 0.69 | 1.56 | 12.01 | 19.16 | 6.78 | 15.73 | 1.26 | 1.86 |

|                                          |      |      |      |       |       |       |      |      |      |       |       |       |       |      |        |
|------------------------------------------|------|------|------|-------|-------|-------|------|------|------|-------|-------|-------|-------|------|--------|
| Uruguay                                  | 0.83 | 2.11 | 0.11 | 0.78  | 0.80  | 1.34  | 0.73 | 0.36 | 0.49 | 1.67  | 14.74 | 3.77  | 23.41 | 2.07 | 1.47   |
| Venezuela<br>(Bolivarian<br>Republic of) | 0.89 | 3.80 | 0.11 | 12.07 | 1.27  | 0.83  | 1.15 | 0.41 | 0.51 | 3.30  | 13.43 | 4.92  | 21.10 | 1.06 | 0.85   |
| British Virgin<br>Islands                | -    | -    | -    | -     | 16.67 | -     | -    | -    | -    | -     | 17.06 | 5.50  | 22.25 | -    | -      |
| Saint Kitts<br>and Nevis                 | -    | -    | -    | -     | 0.94  | 0.50  | 0.37 | 0.58 | 0.51 | -     | -     | 12.02 | 29.66 | 1.83 | 2.63   |
| Saint Pierre<br>and Miquelon             | -    | -    | -    | -     | -     | -     | -    | -    | 5.45 | -     | -     | -     | -     | 2.29 | 117.66 |
| Netherlands<br>Antilles                  | -    | -    | -    | -     | -     | -     | -    | -    | -    | 3.97  | 20.43 | 4.59  | 31.14 | 2.02 | 1.98   |
| Canada                                   | 0.10 | -    | 0.03 | 0.31  | 0.41  | 0.24  | 0.12 | 0.05 | 0.11 | 1.30  | 9.81  | 7.57  | 22.73 | 1.66 | 17.07  |
| United States<br>of America              | 0.11 | 1.87 | 0.03 | 0.39  | 0.23  | 0.42  | 0.15 | 0.04 | 0.11 | 1.17  | 9.04  | 7.29  | 16.31 | 1.51 | 17.42  |
| Greenland                                | -    | -    | -    | -     | -     | -     | -    | -    | -    | -     | -     | -     | 26.44 | -    | -      |
| Bermuda                                  | -    | -    | -    | -     | 0.39  | -     | -    | 0.10 | 0.29 | 3.79  | 19.72 | 15.77 | -     | 2.67 | 28.34  |
| Australia                                | 0.29 | 1.88 | 0.05 | 1.08  | 0.71  | 0.75  | 0.36 | 0.08 | 0.17 | 1.27  | 13.94 | 11.89 | 24.19 | 1.63 | 25.15  |
| Cook Islands                             | -    | -    | -    | -     | 1.28  | 0.49  | -    | 0.06 | 0.18 | -     | -     | 27.61 | -     | 3.59 | 2.93   |
| Fiji                                     | 0.58 | 2.78 | 0.06 | -     | 0.99  | 0.42  | 0.90 | 0.27 | 0.34 | 3.78  | 18.30 | 18.41 | 20.62 | 1.91 | 2.63   |
| Nauru                                    | -    | -    | -    | -     | 0.23  | 0.04  | -    | -    | 0.09 | -     | -     | 27.61 | -     | -    | 3.86   |
| New<br>Caledonia                         | 0.86 | -    | -    | 4.52  | 6.50  | 0.70  | 0.92 | 1.03 | 4.79 | 11.86 | 19.94 | 9.81  | 18.44 | 3.64 | 1.62   |
| Vanuatu                                  | 1.04 | -    | -    | -     | 0.26  | 0.31  | -    | 0.12 | 0.09 | 33.59 | 17.14 | 16.24 | -     | 2.88 | 4.85   |
| New Zealand                              | 2.44 | -    | -    | 3.74  | 7.48  | 11.01 | 2.71 | 1.08 | 3.17 | 1.89  | 20.83 | 10.94 | 27.82 | 1.67 | 17.61  |

|                                  |      |      |      |   |      |      |      |      |      |       |       |       |       |      |       |
|----------------------------------|------|------|------|---|------|------|------|------|------|-------|-------|-------|-------|------|-------|
| Papua New Guinea                 | 0.52 | 6.46 | 0.14 | - | 1.20 | 0.23 | 1.26 | 0.56 | 0.60 | 71.71 | 23.19 | 20.71 | 20.73 | 3.20 | 6.47  |
| Solomon Islands                  | -    | 4.12 | -    | - | 0.03 | 0.01 | 0.02 | 0.01 | 0.01 | 11.12 | 18.80 | 20.70 | -     | 3.59 | 4.85  |
| Tonga                            | -    | -    | -    | - | 2.37 | 0.11 | -    | 0.15 | 0.64 | 5.10  | 18.31 | 18.20 | -     | 3.27 | 4.85  |
| Samoa                            | -    | -    | 0.08 | - | 0.38 | 0.10 | -    | 0.13 | 0.92 | 7.65  | 22.76 | 23.60 | -     | 3.58 | 3.99  |
| Kiribati                         | -    | -    | -    | - | 0.03 | 0.01 | -    | 0.01 | 0.01 | -     | -     | 20.71 | -     | 3.38 | 8.01  |
| Tuvalu                           | -    | -    | -    | - | 0.12 | 0.32 | -    | -    | 0.09 | -     | -     | 27.61 | -     | 2.79 | 13.34 |
| Micronesia (Federated States of) | 0.07 | 4.69 | -    | - | 0.13 | 0.04 | -    | 0.02 | 0.02 | -     | -     | 27.61 | -     | 4.03 | 8.62  |
| French Polynesia                 | -    | -    | 0.01 | - | 0.12 | 0.10 | -    | 0.04 | 0.06 | 3.33  | 23.61 | 14.11 | 20.56 | 3.20 | 1.13  |
| Wallis and Futuna Islands        | -    | -    | 0.03 | - | 0.13 | 0.41 | -    | 0.03 | 0.19 | 4.81  | 19.81 | 16.56 | -     | 3.53 | 5.72  |
| Falkland Islands (Malvinas)      | -    | -    | -    | - | -    | -    | -    | -    | -    | 4.98  | 11.76 | -     | 17.30 | -    | -     |
| Guam                             | 0.03 | -    | -    | - | 0.04 | 0.02 | -    | 0.01 | 0.01 | -     | -     | 13.81 | -     | 3.59 | 2.16  |
| Niue                             | -    | -    | -    | - | 0.21 | 0.04 | -    | 0.01 | 0.01 | 10.46 | 16.41 | 12.90 | -     | 3.51 | 4.12  |
| Tokelau                          | -    | -    | -    | - | 0.02 | 0.01 | -    | 0.01 | -    | -     | -     | 27.61 | -     | 2.15 | -     |
| United States Virgin Islands     | -    | -    | -    | - | -    | -    | -    | -    | -    | 1.49  | 14.06 | 3.87  | 22.22 | -    | -     |
| Western Sahara                   | -    | -    | -    | - | -    | -    | -    | -    | -    | -     | -     | -     | 31.54 | -    | -     |

|                |   |   |      |   |      |      |   |      |      |      |       |       |   |      |      |
|----------------|---|---|------|---|------|------|---|------|------|------|-------|-------|---|------|------|
| American Samoa | - | - | 0.24 | - | 0.09 | 0.04 | - | 0.03 | 0.05 | 8.88 | 22.81 | 16.56 | - | 3.60 | 4.84 |
|----------------|---|---|------|---|------|------|---|------|------|------|-------|-------|---|------|------|

Source: [3].



## References

1. Hawkins, J.; Ma, C.; Schilizzi, S., Zhang, F. Apples to kangaroos: A framework for developing internationally comparable carbon emission factors for crop and livestock products. *J. Clean Prod.* 2016,139, 460-472. <https://doi.org/10.1016/j.jclepro.2016.08.060>.
2. CCSY 1996-2016. *China Customs Statistics Yearbooks 1996-2016*. China Customs Press: Beijing.
3. Food and Agricultural Organization of the United Nations. Food and agriculture data. 2022. Available online: <http://www.fao.org/faostat/en/>. (accessed on 25 February 2022).
